# Supplementary material for: New solvatochromic probes: performance enhancement via regulation of excited state structures
Source: Royal Society of Chemistry journal article supplement (doi:10.1039/c6cp04293g), 2016-01-01
Supplement: c6cp04293g1.pdf [file c6cp04293g1.pdf]

# Electronic Supplementary Information

*for*

## New Solvatochromic Probes: Performance Enhancement via

### Regulation of Excited State Structures

Huijing Liu<sup>a,b</sup>, Xiaojie Xu<sup>a,c</sup>, Haonan Peng<sup>a,c</sup>, Xingmao Chang<sup>a,b</sup>, Xuwei Fu<sup>a,c</sup>, Qianshu Li<sup>c</sup>,

Shiwei Yin<sup>c\*</sup>, Gary J. Blanchard<sup>d\*</sup>, Yu Fang<sup>a,c\*</sup>

<sup>a</sup> Key Laboratory of Applied Surface and Colloid Chemistry (Ministry of Education),

<sup>b</sup> School of Materials Science and Engineering,

<sup>c</sup> School of Chemistry and Chemical Engineering, Shaanxi Normal University, Xi'an 710062, P. R. China

<sup>d</sup> Department of Chemistry, Michigan State University, East Lansing, Michigan 48824, United States

## CONTENTS

1. Supplementary Schemes and Figures
2. Experiment Section
3. <sup>1</sup>H and <sup>13</sup>C NMR spectra for all compounds
4. MS spectra for PNBA, PNBD, BPNBA and BPNBD
5. The optimized structures for PNBD and BPNBD
6. References

---

\* Corresponding author, E-mail: yfang@snnu.edu.cn (Yu Fang); Tel: 0086-29-81530786; Fax: 0086-29-81530787.

## 1. Supplementary Schemes and Figures

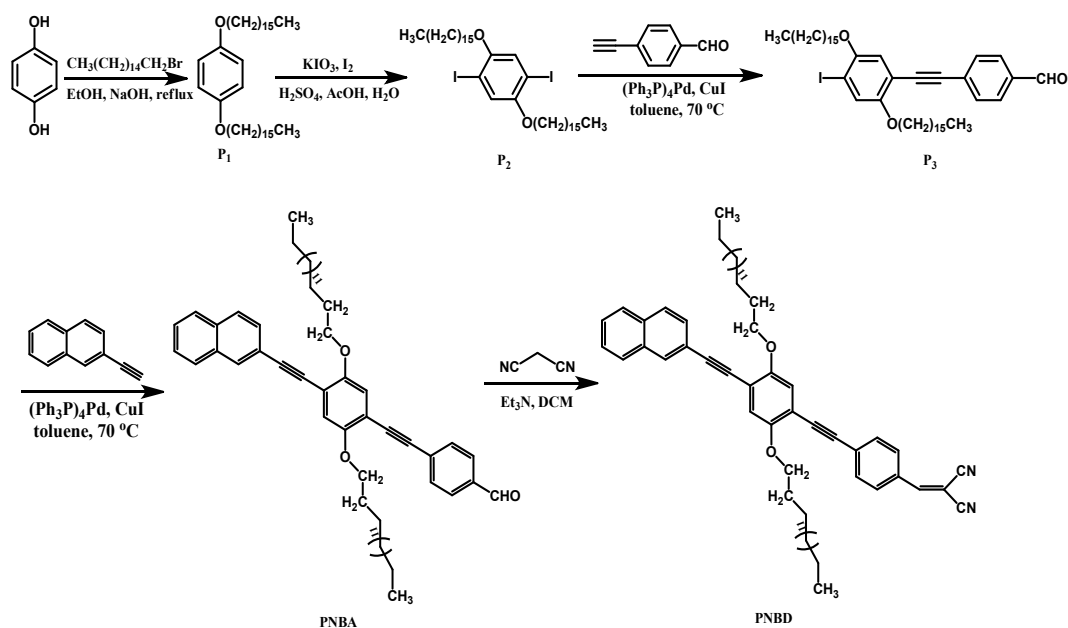

**Scheme S1** The synthesis route of PNBD

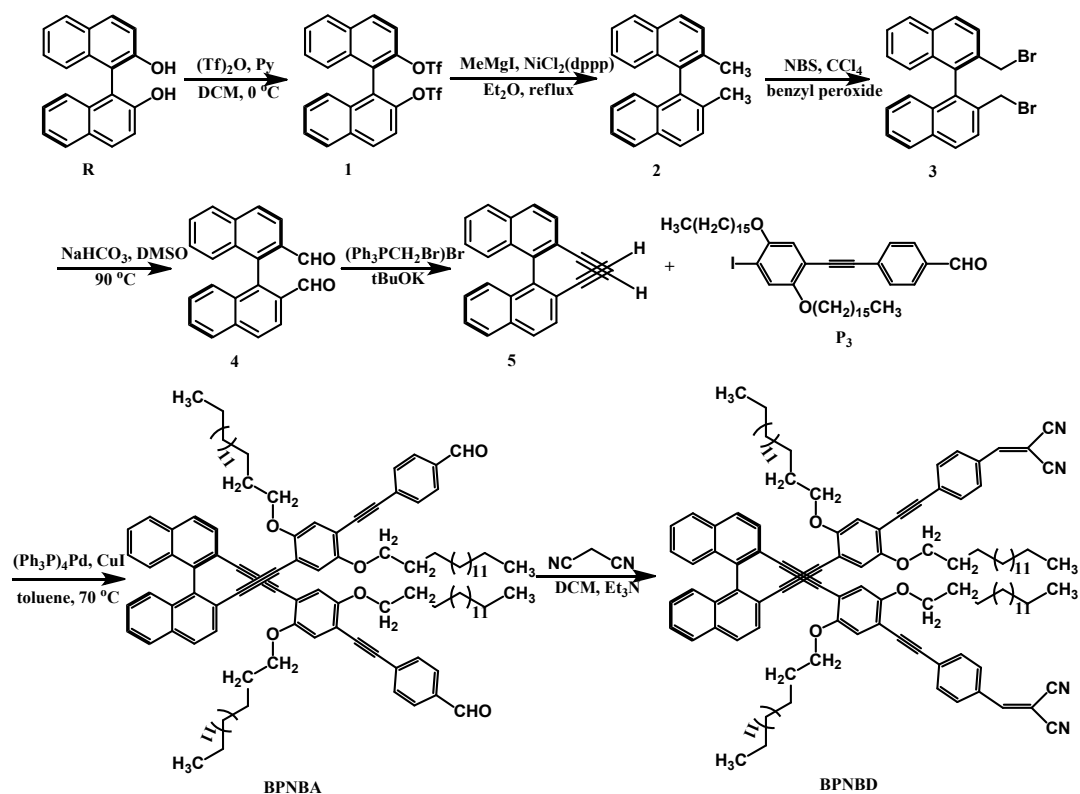

**Scheme S2** The synthesis route of BPNBD

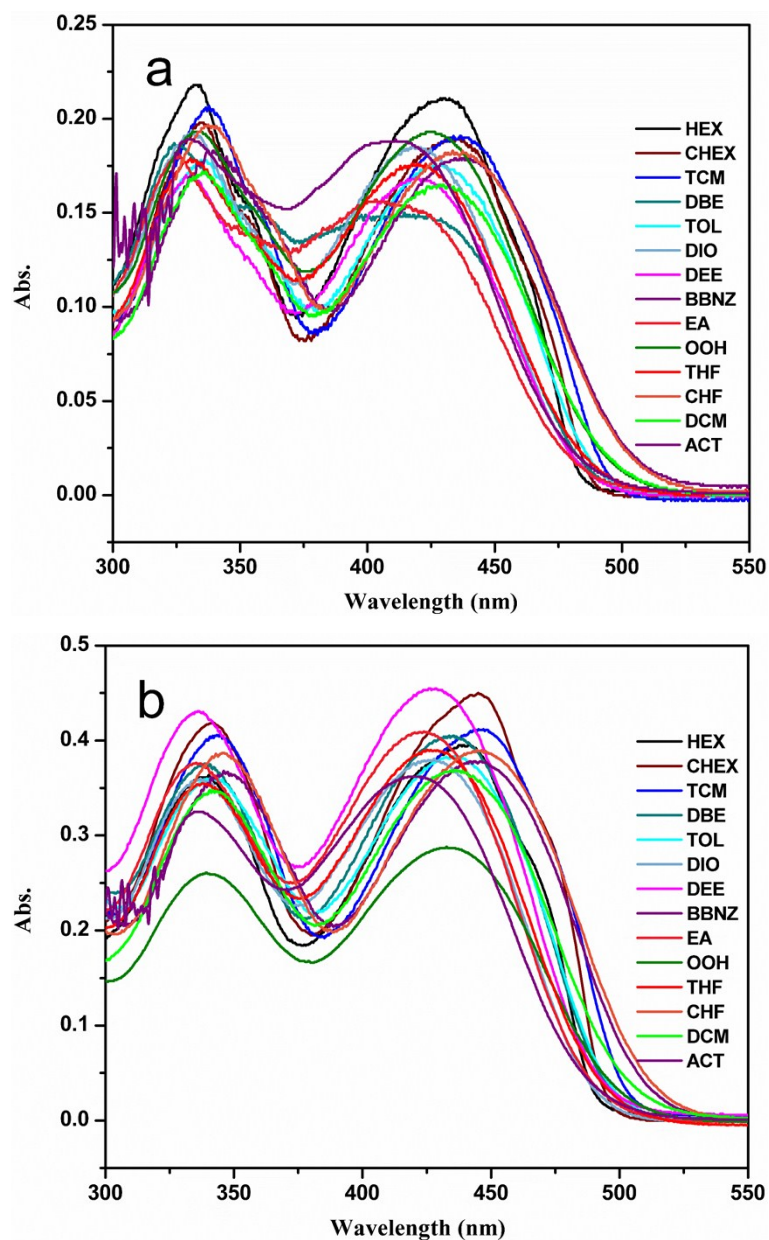

**Figure S1** UV-vis absorptions of PNBD (a) and BPNBD (b) in different solvents (HEX: hexane, CHEX: cyclohexane, TCM: carbon tetrachloride, DBE: *n*- dibutyl ether, TOL: toluene, DIO: dioxane, DEE: diethyl ether, BBNZ: bromobenzene, EA: ethylacetate, OOH: *o*-octanol, THF, CHF: chloroform, DCM: dichloromethane and ACT: acetone) at a concentration of  $5.0 \times 10^{-6}$  mol/L.

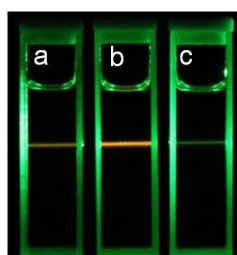

**Figure S2** Tyndall test of the compound in *n*-octanol at a concentration of  $5.0 \times 10^{-6}$  mol/L.  
Note: a-PNBD, b-BPNBD, c-blank

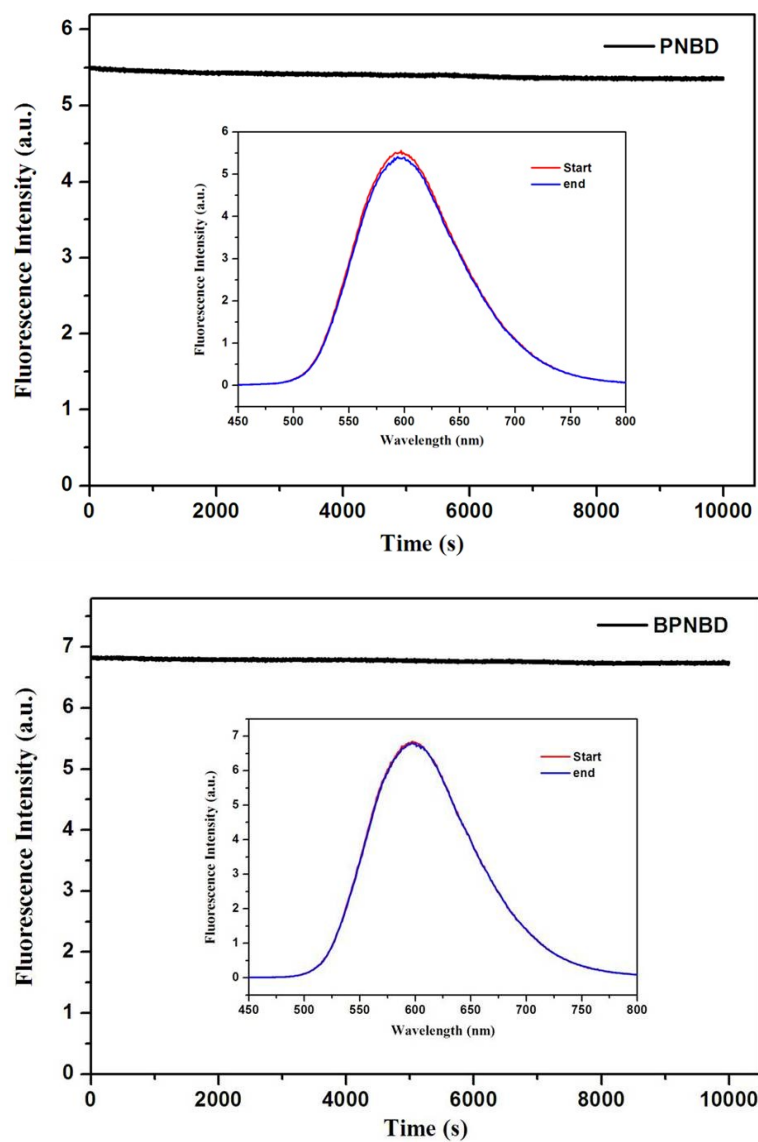

**Figure S3** Photochemical stability of PNBD and BPNBD in  $\text{CHCl}_3$  at a concentration of  $5.0 \times 10^{-6}$  mol/L, of which the emissions were monitored at the maximum emission wavelengths of them with 430 nm as the excitation wavelength. The insets of the two Figures are the emission spectra of the two investigated fluorophores recorded before and after the illumination.

### PNBD

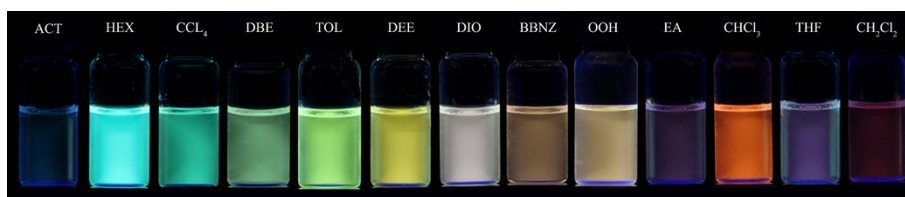

### BPBND

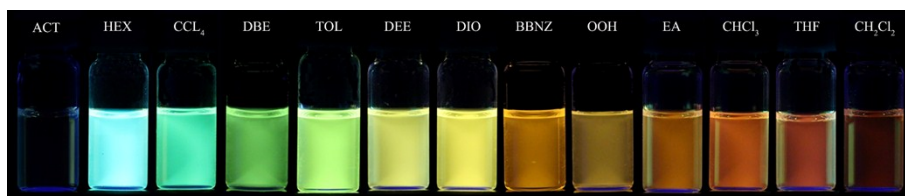

**Figure S4** The fluorescence images of PNBD and BPBND in fourteen different solvents.

Note: ACT: acetone, HEX: hexane, DBE: *n*-dibutyl ether, TOL: toluene, DEE: diethyl ether, DIO: dioxane, BBNZ: bromobenzene, OOH: *o*-octanol, EA: ethylacetate, and THF: tetrahydrofuran.

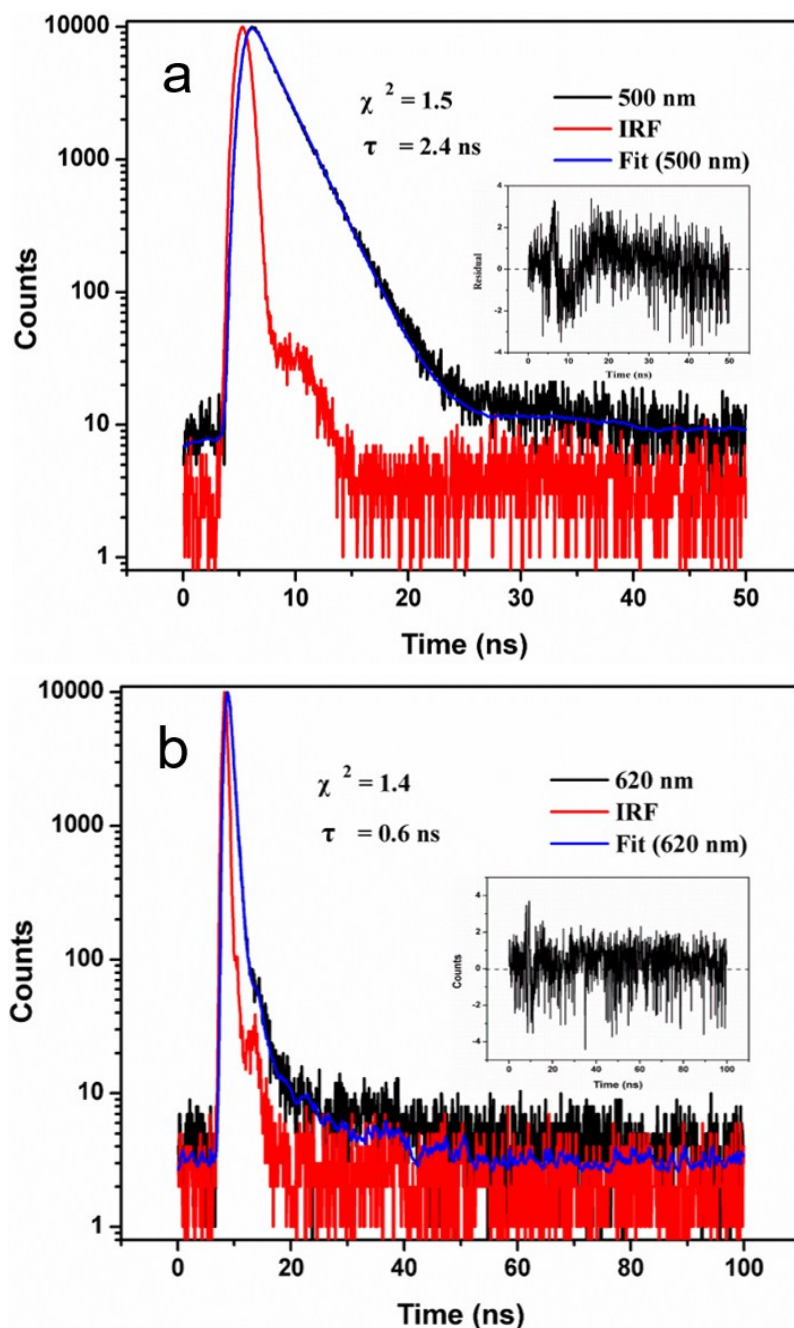

**Figure S5** Fluorescence decays of PNBD in  $\text{CH}_2\text{Cl}_2$  monitored at a concentration of  $5.0 \times 10^{-6}$  mol/L with 405 nm as the excitation wavelength and 500 and 620 nm as the monitoring wavelength, respectively.

Note: With reference to the two decays and the fitting results shown in the insets of the figures, it is clearly seen: 1) the two decays could roughly be fitted with a mono-exponential function as evidenced by the relatively close to 1 of the  $\chi^2$  values and the randomly distributed residue distributions, suggesting that each of the decays originates from only one component; 2) the excited state of PNBD with higher energy possesses longer lifetime ( $\sim 2.4$  ns), in accordance with the theoretical expectation; 3) the excited state of PNBD with lower energy possesses shorter lifetime ( $\sim 0.6$  ns), also in accordance with the theoretical expectation.

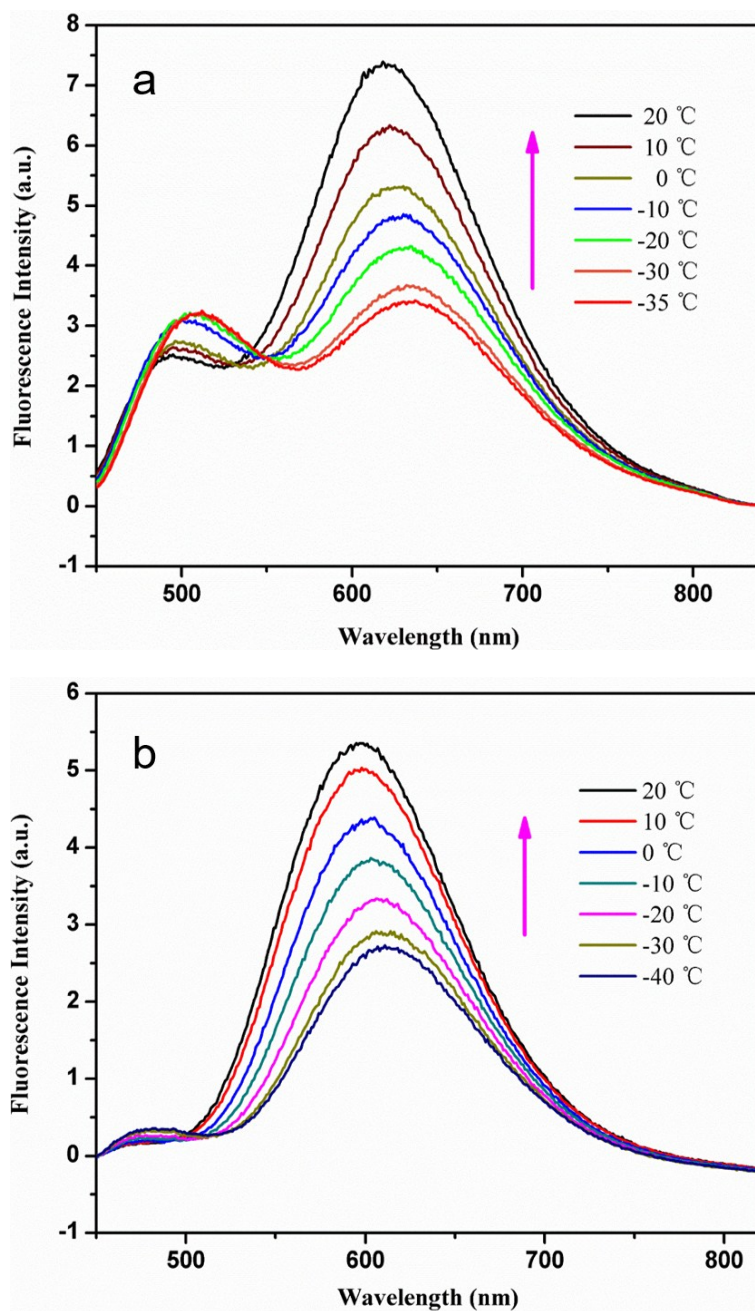

**Figure S6** Temperature-dependent fluorescence emission of PNBD in  $\text{CH}_2\text{Cl}_2$  (a) and ethyl-acetate (b) recorded at a concentration of  $5.0 \times 10^{-6}$  mol/L ( $\lambda_{\text{ex}} = 430$  nm)

Note: With reference to the profiles of the spectra, it is seen that emission from  $S_3$  state is inhibited upon increasing temperature, possibly due to enhanced radiationless transition to lower excited state and even ground.



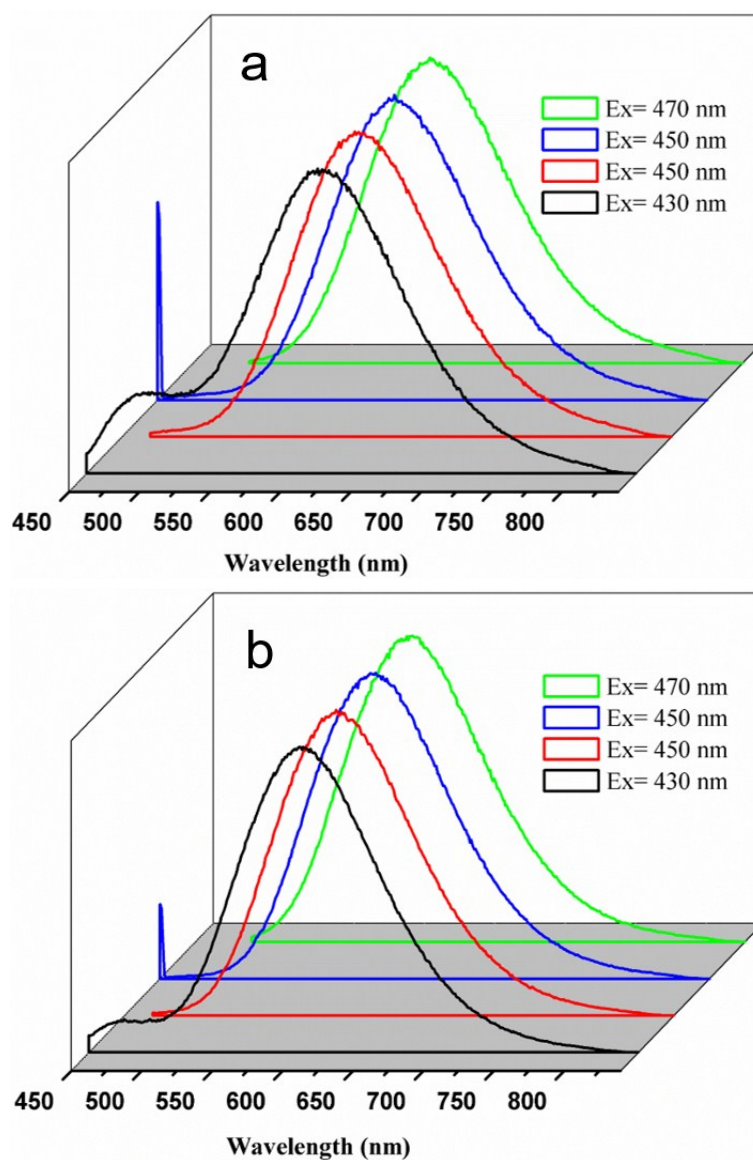

**Figure S7** Fluorescence emission spectra of PNBD in CH<sub>2</sub>Cl<sub>2</sub> (a) and THF (b) recorded at a concentration of  $5.0 \times 10^{-6}$  mol/L with different excitation wavelengths.

Note: Dual fluorescence could not be observed when a longer wavelength was adopted as the excitation wavelength due to absence of S<sub>3</sub> state.

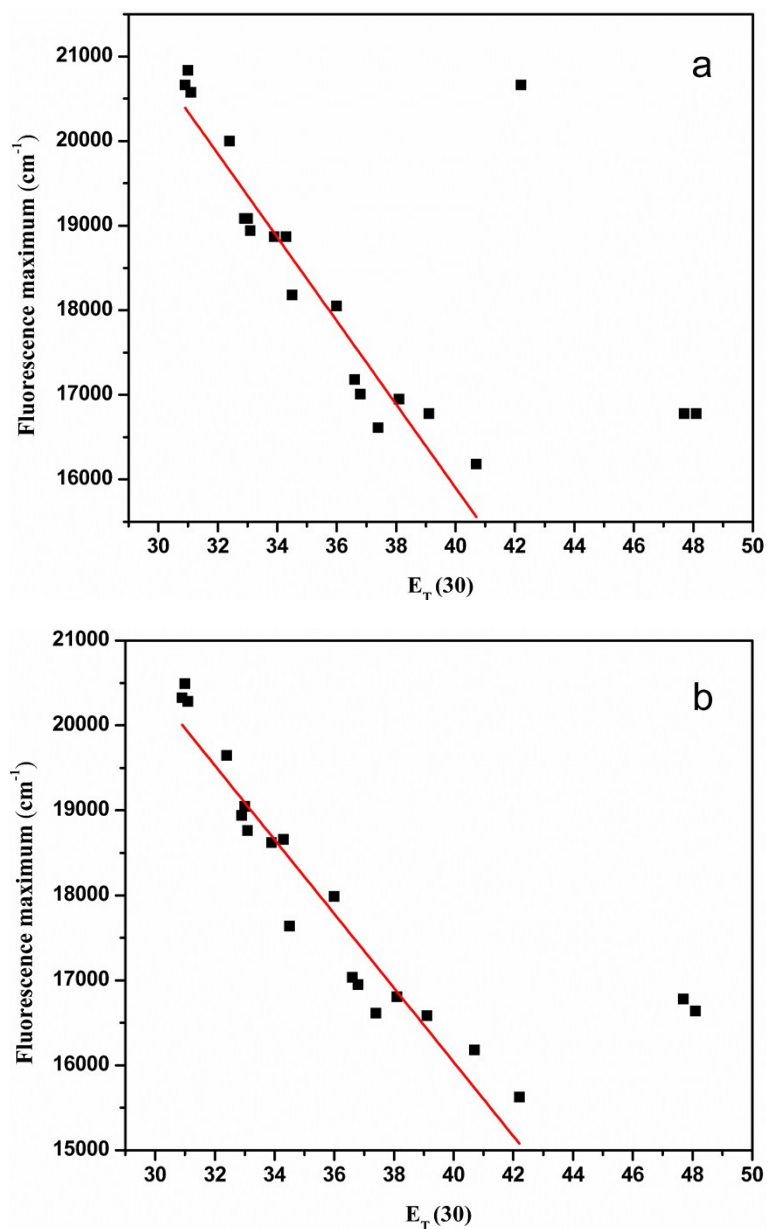

**Figure S8** Plots of the wave numbers of the maximum fluorescence emissions of PNBD (a) and BPNBD (b) in different solvents vs the polarity indexes  $E_T(30)$  of the corresponding solvents, of which the solvents from left to right are: cyclohexane, hexane, *n*-dodecane, CCl<sub>4</sub>, 1,3,5-trimethylbenzene, di-*n*-butyl-ether, *p*-xylene, toluene, benzene, diethyl ether, 1,4-dioxane, bromobenzene, chlorobenzene, THF, EA, CHCl<sub>3</sub>, CH<sub>2</sub>Cl<sub>2</sub>, acetone, *n*-decanol, *n*-octanol.

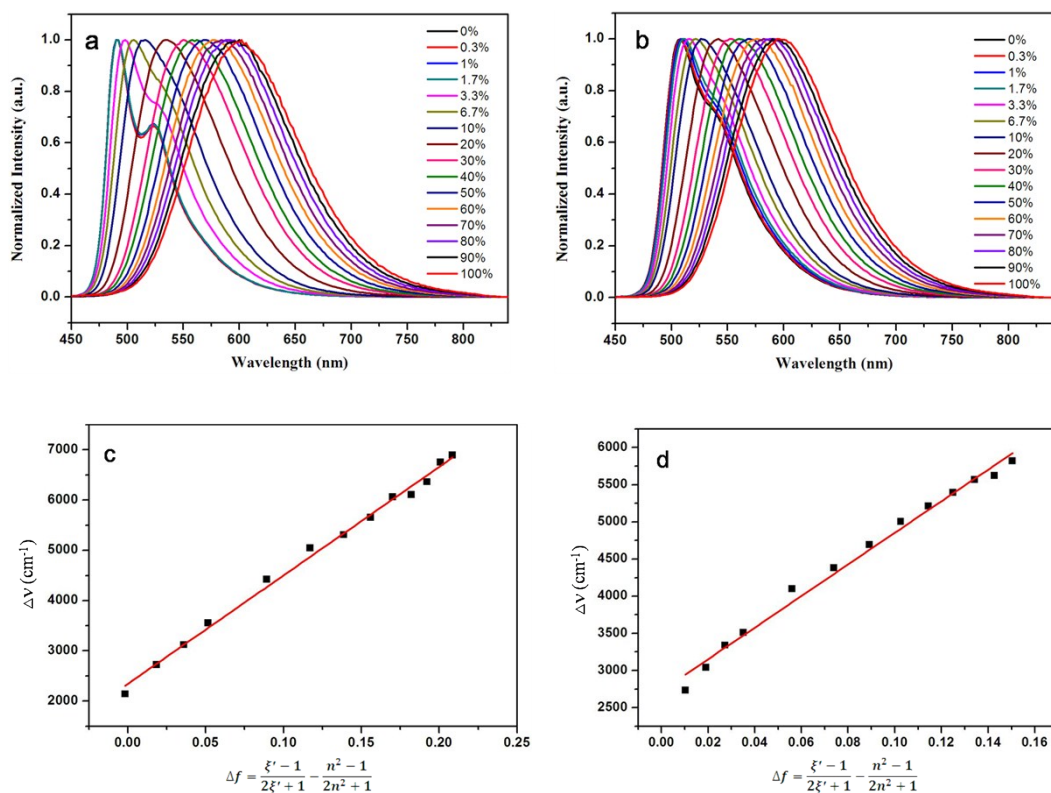

**Figure S9** Fluorescence emission spectra of BPNBD in cyclohexane-THF (a), or  $\text{CCl}_4\text{-CHCl}_3$  (b) of different ratios at a concentration of  $5.0 \times 10^{-6}$  mol/L, of which both excitation wavelengths are 430 nm. Lippert plots for BPNBD in the two sets of mixture solvents (c, d).

**Table S1.** Fluorescence quantum yields of PNBD in two different solvents determined with different excitation wavelength ( $1.0 \times 10^{-6}$  mol/L)

| Solvent           | $\lambda_{\text{EX}}$ (430 nm) | $\lambda_{\text{EX}}$ (460 nm) | $\lambda_{\text{EX}}$ (490 nm) |
|-------------------|--------------------------------|--------------------------------|--------------------------------|
| 1,4-Dioxane       | 0.50                           | 0.64                           | 0.75                           |
| <i>n</i> -Octanol | 0.35                           | 0.40                           | 0.43                           |

## 2. Experiment section

**Synthesis of P<sub>1</sub>.** To a solution of 1-bromo-*n*-hexadecane (45 g, 147.4 mmol) in ethanol (75 mL) was added a mixture of 1,4-dihydroxybenzene (5.41 g, 49 mmol), NaOH (4.32 g, 108.2 mmol) and ethanol (105 mL). The reaction mixture was heated to reflux for 4 h. After cooling to room temperature, the mixture was extracted with CH<sub>2</sub>Cl<sub>2</sub> and the residue was removed by filtration. The solution was washed with water and the organic layer was dried over anhydrous sodium sulfate and evaporated in vacuo. The crude sample was passed through a silica gel plug (PE/DCM = 1/10) to afford compound P<sub>1</sub> as white solid (17.9 g, 65%). <sup>1</sup>H NMR (600 MHz, CDCl<sub>3</sub>) δ (ppm) 6.81 (s, 4H), 3.89 (t, 4H, *J* = 6.6 Hz), 1.75 (m, 4H), 1.43 (m, 4H), 1.34-1.26 (m, 48H), 0.88 (t, 6H, *J* = 6.6 Hz). <sup>13</sup>C NMR (400 MHz, CDCl<sub>3</sub>) δ (ppm) 153.22, 115.41, 68.69, 29.69, 29.66, 29.60, 29.58, 29.42, 29.36, 26.07, 22.69, 14.10.

**Synthesis of P<sub>2</sub>.** A mixture of compound P<sub>1</sub> (17.9 g, 31.9 mmol), potassium iodate (4.1 g, 19.1 mmol), iodine (8.6 g, 33.8 mmol), acetic acid (131.7 mL), sulfuric acid (4.1 mL), and water (8.5 mL) was stirred at 80 °C for 4 h. After cooling to room temperature, the excess iodine was destroyed with an aqueous sodium sulfite solution (10%), and then the mixture was poured into ice water. The aqueous layer was extracted with chloroform, and the combined organic layer was dried over anhydrous sodium sulfate and evaporated in vacuo. The residue was chromatographed (PE/DCM = 5/1) to afford compound P<sub>2</sub> as white solid (20.7 g, 80%). <sup>1</sup>H NMR (600 MHz, CDCl<sub>3</sub>) δ (ppm) 7.17 (s, 2H), 3.93 (m, 4H), 1.79 (m, 4H), 1.49 (m, 4H), 1.26 (m, 24H), 0.88 (t, 6H, *J* = 6.6, 7.2 Hz). <sup>13</sup>C NMR (400 MHz, CDCl<sub>3</sub>) δ (ppm) 152.95, 122.90, 86.37, 70.44, 31.96, 29.73, 29.69, 29.61, 29.59, 29.39, 29.31, 29.20, 26.07, 22.72.

**Synthesis of P<sub>3</sub>.** To a solution of diisopropylamine in toluene was added compound P<sub>2</sub> (790 mg, 0.97 mmol), 4-ethynylbenzaldehyde (48 mg, 0.37 mmol), Pd(Ph<sub>3</sub>P)<sub>4</sub> (21.2 mg, 0.018 mmol) and CuI (3.5 mg, 0.018 mmol). The mixture was stirred at 70 °C for 24 h. After cooling to room temperature, the reaction mixture was diluted with CH<sub>2</sub>Cl<sub>2</sub> (100 mL), and then washed with water and brine. The organic layer was dried over anhydrous sodium sulfate, concentrated and passed through a silica gel plug

(PE/DCM = 3/1) to afford compound P<sub>3</sub> as pale yellow solid (110 mg, 36.7%). <sup>1</sup>H NMR (600 MHz, CDCl<sub>3</sub>) δ (ppm) 10.02 (s, 1H), 7.86 (d, 2H, *J* = 12 Hz), 7.66 (d, 2H, *J* = 12.6 Hz), 7.33 (s, 1H), 6.91 (s, 1H), 3.98 (m, 4H), 1.81 (m, 4H), 1.48 (m, 4H), 1.26 (m, 48H), 0.88 (t, 6H, *J* = 9.6, 10.8 Hz). <sup>13</sup>C NMR (600 MHz, CDCl<sub>3</sub>) δ (ppm) 191.33, 154.55, 151.84, 135.40, 132.00, 129.57, 115.99, 112.72, 93.26, 89.88, 88.79, 70.20, 69.87, 29.71, 29.58, 29.39, 29.37, 29.32, 29.30, 29.19, 26.09, 26.05, 22.70, 14.12.

**Synthesis of PNBA.** A 25 mL flask was charged with naphthylene-2-acetylene (20 mg, 0.13 mmol), P<sub>3</sub> (0.1 g, 0.12 mmol), Pd(Ph<sub>3</sub>P)<sub>4</sub> (8.5 mg, 0.074 mmol), CuI (3.4 mg, 0.018 mmol), diisopropyl-amine (3 mL) and toluene (7 mL). The reaction mixture was stirred at 75 °C for 12 h. After cooling to room temperature, the reaction mixture was diluted with CH<sub>2</sub>Cl<sub>2</sub> (100 mL), and then washed with water and brine. The organic layer was dried over anhydrous sodium sulfate, concentrated and passed through a silica gel plug (PE/DCM = 2/1) to afford compound PNBA (92 mg, 92%). <sup>1</sup>H NMR (600 MHz, CDCl<sub>3</sub>) δ (ppm) 10.02 (s, 1H), 8.06 (s, 1H), 7.87 (d, *J* = 8.4 Hz, 2H), 7.82 (t, *J* = 18, 10.2 Hz, 3H), 7.68 (d, *J* = 8.4 Hz, 2H), 7.59 (dd, *J* = 8.4, 1.2 Hz, 1H), 7.50 (m, 2H), 7.07 (s, 1H), 7.04 (s, 1H), 4.07 (m, 4H), 1.88 (m, 4H), 1.58 (m, 4H), 1.40 (m, 4H), 1.34-1.21 (m, 44H), 0.88 (t, *J* = 13.8, 7.2 Hz, 6H). <sup>13</sup>C NMR (600 MHz, CDCl<sub>3</sub>) δ (ppm) 191.35, 154.03, 153.77, 135.44, 131.51, 129.60, 128.03, 127.82, 126.59, 120.73, 117.13, 116.94, 115.12, 113.11, 95.83, 93.94, 90.36, 86.28, 69.83, 69.67, 29.73, 29.69, 29.66, 29.54, 29.45, 29.39, 26.20, 26.13, 22.71, 14.13. MS (MALDI-TOF): (*m/z*) calcd for (C<sub>59</sub>H<sub>80</sub>O<sub>3</sub>), 836.61, found: 836.38.

**Synthesis of PNBD.** To a solution of compound PNBA (72 mg, 0.086 mmol) in dichloromethane was added triethylamine (12 μL, 0.086 mmol) and malononitrile (6.2 mg, 0.094 mmol). The reaction mixture was stirred at room temperature for 2 h and then removed the solvent under vacuum. The crude product was passed through a silica gel plug (PE/DCM = 2/1) to afford compound PNBD (60 mg, 84%) as a yellow solid. <sup>1</sup>H NMR (600 MHz, CDCl<sub>3</sub>) δ (ppm) 8.06 (s, 1H), 7.90 (d, *J* = 8.4 Hz, 2H), 7.81 (m, 3H), 7.72 (s, 1H), 7.65 (d, *J* = 8.4 Hz, 2H), 7.59 (d, *J* = 9.6 Hz, 1H), 7.50 (m, 2H), 7.08 (s, 1H), 7.04 (s, 1H), 4.06 (m, 4H), 1.88 (m, 4H), 1.59 (m, 4H), 1.40 (m, 4H),

1.34-1.21 (m, 44H), 0.88 (t,  $J = 14.4$  Hz, 6H).  $^{13}\text{C}$  NMR (600 MHz,  $\text{CDCl}_3$ )  $\delta$  (ppm) 158.42, 154.12, 153.69, 133.03, 132.91, 132.34, 131.52, 130.68, 130.28, 130.10, 128.35, 128.01, 127.81, 127.80, 126.77, 126.59, 120.61, 117.70, 116.76, 115.49, 113.76, 112.63, 112.60, 96.08, 93.82, 92.17, 86.60, 82.53, 69.76, 69.54, 31.93, 29.71, 29.67, 29.64, 29.52, 29.42, 29.40, 29.31, 26.18, 26.07, 22.70, 14.12. MS (MALDI-TOF): (m/z) calcd for ( $\text{C}_{59}\text{H}_{80}\text{O}_3$ ), MS (MALDI-TOF): (m/z) calcd for ( $\text{C}_{124}\text{H}_{158}\text{N}_4\text{O}_4$ ), 884.62, found: 884.70.

**Synthesis of (R)-2,2'-bistriflate-1,1'-binaphthyl (1).** To a solution of (R)-BINOL (11.53 g, 40.3 mmol) in 120 mL dichloromethane was added pyridine (13.4 mL) and followed by dropwise addition of triflic anhydride (14.9 mL, 88.6 mmol) at 0 °C. The mixture was stirred at room temperature overnight. After removal of the solvent, the residue was diluted with EtOAc (300 mL) and then washed with 5% aqueous HCl, saturated  $\text{NaHCO}_3$ , and brine. The organic layer was dried over anhydrous sodium sulfate, concentrated and passed through a silica gel plug (with PE/EA = 30/1) to give the (R)-bistriflate (19.95 g, 90%).  $^1\text{H}$  NMR (600 MHz,  $\text{CDCl}_3$ )  $\delta$  (ppm) 8.14 (d, 2H,  $J = 9.6$  Hz), 8.01 (d, 2H,  $J = 8.4$  Hz), 7.60 (m, 4H), 7.41 (m, 2H), 7.25 (m, 2H).  $^{13}\text{C}$  NMR (600 MHz,  $\text{CDCl}_3$ )  $\delta$  (ppm) 145.42, 133.19, 132.39, 131.99, 128.37, 128.00, 127.34, 126.77, 123.47, 119.34.

**Synthesis of (R)-2,2'-dimethyl-1,1'-binaphthyl (2).** Under nitrogen, a solution of MeI (11.3 mL, 181.7 mmol) in diethyl ether was added dropwise to a stirred suspension of Mg turnings (4.86 g, 199.8 mmol) and a little of iodine, and the solution was gently refluxed throughout the addition. The mixture was cooled to room temperature which was added dropwise to a solution of (R)-bistriflate (10 g, 18.2 mmol) in diethyl ether and  $\text{NiCl}_2(\text{dppp})$  (492.4 mg, 0.9 mmol). The reaction mixture was heated to boiling and then refluxed for 24 h. The reaction was quenched by addition of saturated  $\text{NH}_4\text{Cl}$  slowly at 0 °C. The aqueous layer was extracted with ether. The combined organic layer was washed with saturated  $\text{NaHCO}_3$ , dried over anhydrous sodium sulfate, concentrated and passed through a silica gel plug (pure petroleum ether) to afford (R)-2,2'-dimethyl-1,1'-binaphthyl as a white solid (4.36 g, 85%).  $^1\text{H}$  NMR (600 MHz,  $\text{CDCl}_3$ )  $\delta$  (ppm) 7.89 ~ 7.86 (m, 4H), 7.50 (d, 2H,  $J = 8.4$

Hz), 7.37 (m, 2H), 7.19 (m, 2H), 7.04 (d, 2H,  $J = 8.4$  Hz), 2.03 (s, 6H).  $^{13}\text{C}$  NMR (600 MHz,  $\text{CDCl}_3$ )  $\delta$  (ppm) 135.18, 134.32, 132.81, 132.27, 128.77, 127.97, 127.48, 126.13, 125.69, 124.94, 20.08.

**Synthesis of (R)-2,2'-bis(bromomethyl-1,1'-binaphthyl (3).** Under nitrogen (R)-2,2'-dimethyl-1,1'-binaphthyl (1.06 g, 3.8 mmol), *N*-bromosuccinimide (1.47 g, 8.3 mmol) and benzyl peroxide (91.2 mg, 0.038 mmol) were stirred in  $\text{CCl}_4$  (10 mL). The reaction mixture was heated to boiling and refluxed for 6 h. After cooling,  $\text{CCl}_4$  was removed under vacuum and the residue was dissolved with EtOAc (100 mL). The resultant organic solution was washed with water and brine, dried over anhydrous sodium sulfate and concentrated in vacuo. The crude sample was used for the following reaction without further purification.

**Synthesis of (R)-2,2'-diformyl-1,1'-binaphthyl (4).** To a solution of the crude product of the former step in DMSO was added  $\text{NaHCO}_3$  (1.9 g, 11.9 mmol). The reaction mixture was heated to 90 °C for 6 h. The mixture was cooled to room temperature before additional diethyl ether (150 mL) was added. This ether solution was washed with water and brine, dried over anhydrous sodium sulfate, concentrated and passed through a silica gel plug (PE/EA = 10/1) to afford (R)-2,2'-diformyl-1,1'-binaphthyl (0.48 g, 42%) (42% overall yield via 2 steps from (R)-2,2'-dimethyl-1,1'-binaphthyl).  $^1\text{H}$  NMR (600 MHz,  $\text{CDCl}_3$ )  $\delta$  (ppm) 9.63 (s, 2H, -CHO), 8.21 (d, 2H,  $J = 8.4$  Hz), 8.13 (d, 2H,  $J = 9.0$  Hz), 8.02 (d, 2H, 7.8 Hz), 7.63 (m, 2H), 7.38 (m, 2H), 7.24 (d, 2H,  $J = 8.4$  Hz).  $^{13}\text{C}$  NMR (600 MHz,  $\text{CDCl}_3$ )  $\delta$  (ppm) 191.05, 139.64, 135.92, 133.46, 133.24, 129.77, 129.42, 128.54, 127.90, 127.28, 122.31.

**Synthesis of (R)-2,2'-diethynyl-1,1'-binaphthyl (5).** A 50 mL flask was charged with bromo-methyl-triphenylphosphonium (1.76 g, 4.04 mmol) and THF (10 mL), and *t*-BuOK (904 mg, 8.06 mmol) was added at -78 °C. The mixture was stirred at this temperature for 1 h, and (R)-2,2'-dimethyl-1,1'-binaphthyl (0.5 g, 1.6 mmol) in THF was added. After being stirred at -78 °C for 30 min, the mixture was stirred at 0 °C for another 2 h, and then the reaction mixture was poured into aqueous  $\text{NH}_4\text{Cl}$  solution. After usual work-up with water/EtOAc, the combined organic layer was dried over anhydrous sodium sulfate and evaporated in vacuum. The residue was



chromate-graphed (PE/EA = 20/1) to afford (R)-2,2'-diethynyl-1,1'-binaphthyl (0.2 g, 41%). <sup>1</sup>H NMR (600 MHz, CDCl<sub>3</sub>) δ (ppm) 7.91 (t, 2H, *J* = 8.4, 6.6 Hz), 7.72 (d, 2H, *J* = 9.0 Hz), 7.48 (m, 2H), 7.28 (m, 2H), 7.14 (d, 2H, *J* = 8.4 Hz), 2.78 (s, 2H). <sup>13</sup>C NMR (600 MHz, CDCl<sub>3</sub>) δ (ppm) 140.41, 133.17, 132.38, 128.94, 128.13, 128.07, 126.89, 126.76, 126.39, 120.42, 82.69, 80.66.

**Synthesis of BPNBA.** A 50 mL flask was charged with (R)-2,2'-diethynyl-1,1'-binaphthyl (93 mg, 0.31 mmol), P<sub>3</sub> (0.5 g, 0.62 mmol), Pd(Ph<sub>3</sub>P)<sub>4</sub> (35.5 mg, 0.031 mmol), CuI (6 mg, 0.031 mmol), diisopropylamine (6 mL) and toluene (14 mL). The mixture was stirred at 75 °C for 12 h. After cooling to room temperature, the reaction mixture was diluted with CH<sub>2</sub>Cl<sub>2</sub> (150 mL), and then washed with water and brine. The organic layer was dried over anhydrous sodium sulfate, concentrated and passed through a silica gel plug (PE/DCM = 1/1) to afford compound BPNBA (0.42 g, 81%). <sup>1</sup>H NMR (600 MHz, CDCl<sub>3</sub>) δ (ppm) 10.00 (s, 2H), 7.95 (d, 2H, *J* = 8.4 Hz), 7.92 (d, 2H, *J* = 8.4 Hz), 7.83 (d, 4H, *J* = 8.4 Hz), 7.78 (d, 2H, *J* = 8.4 Hz), 7.61 (d, 4H, *J* = 8.4 Hz), 7.49 (m, 2H), 7.40 (d, 2H, *J* = 8.4 Hz), 7.34 (m, 2H), 6.81 (s, 2H), 5.68 (s, 2H), 3.82 (m, 4H), 3.74 (m, 2H), 3.68 (m, 2H), 1.82 (m, 4H), 1.70 (m, 4H), 1.57 (m, 4H), 1.44 (m, 8H), 1.39-1.25 (m, 92H), 0.87 (dt, 12H, *J* = 9.0, 6.6, 2.4 Hz). <sup>13</sup>C NMR (600 MHz, CDCl<sub>3</sub>) δ (ppm) 191.32, 153.59, 152.70, 140.41, 131.95, 127.82, 126.65, 122.01, 117.05, 116.81, 115.04, 112.49, 95.18, 93.72, 90.54, 90.35, 69.69, 69.14, 29.75, 29.68, 29.55, 29.42, 29.38, 29.36, 29.14, 26.20, 25.95, 22.70, 14.12. MS (MALDI-TOF): (*m/z*) calcd for (C<sub>118</sub>H<sub>158</sub>O<sub>6</sub>), 1671.20, found: 1671.17.

**Synthesis of BPNBD.** To a solution of compound BNPA (94 mg, 0.056 mmol) in dichloromethane was added triethylamine (16 μL, 0.11 mmol) and malononitrile (8.2 mg, 0.12 mmol). The reaction mixture was stirred at room temperature for 2 h and then removed the solvent under vacuum. The crude product was passed through a silica gel plug (PE/DCM = 1/1) to afford compound BPNBD (81 mg, 84%) as an orange red foam. <sup>1</sup>H NMR (600 MHz, CDCl<sub>3</sub>) δ (ppm) 7.95 (d, 2H, *J* = 8.4 Hz), 7.92 (d, 2H, *J* = 8.4 Hz), 7.87 (d, 4H, *J* = 8.4 Hz), 7.78 (d, 2H, *J* = 8.4 Hz), 7.70 (s, 2H), 7.58 (d, 4H, *J* = 8.4 Hz), 7.49 (m, 2H), 7.40 (d, 2H, *J* = 8.4 Hz), 7.34 (m, 2H), 6.81 (s, 2H), 5.67 (s, 2H), 3.82 (m, 4H), 3.73 (m, 2H), 3.68 (m, 2H), 1.82 (m, 4H), 1.69 (m, 4H), 1.57 (m,

4H), 1.44 (m, 8H), 1.38-1.25 (m, 92H), 0.87 (td, 12H,  $J = 9.6, 6.6, 2.4$  Hz).  $^{13}\text{C}$  NMR (600 MHz,  $\text{CDCl}_3$ )  $\delta$  (ppm) 158.43, 153.79, 152.73, 140.50, 132.31, 130.07, 127.76, 126.73, 121.99, 117.09, 115.52, 113.79, 112.65, 112.15, 95.46, 93.69, 92.24, 90.54, 82.53, 69.75, 69.16, 31.96, 29.77, 29.71, 29.54, 29.44, 29.40, 29.35, 29.17, 25.98, 22.72, 14.14. MS (MALDI-TOF): (m/z) calcd for ( $\text{C}_{124}\text{H}_{158}\text{N}_4\text{O}_4$ ), 1767.23, found: 1767.04.

### 3. $^1\text{H}$ and $^{13}\text{C}$ NMR spectra for all compounds

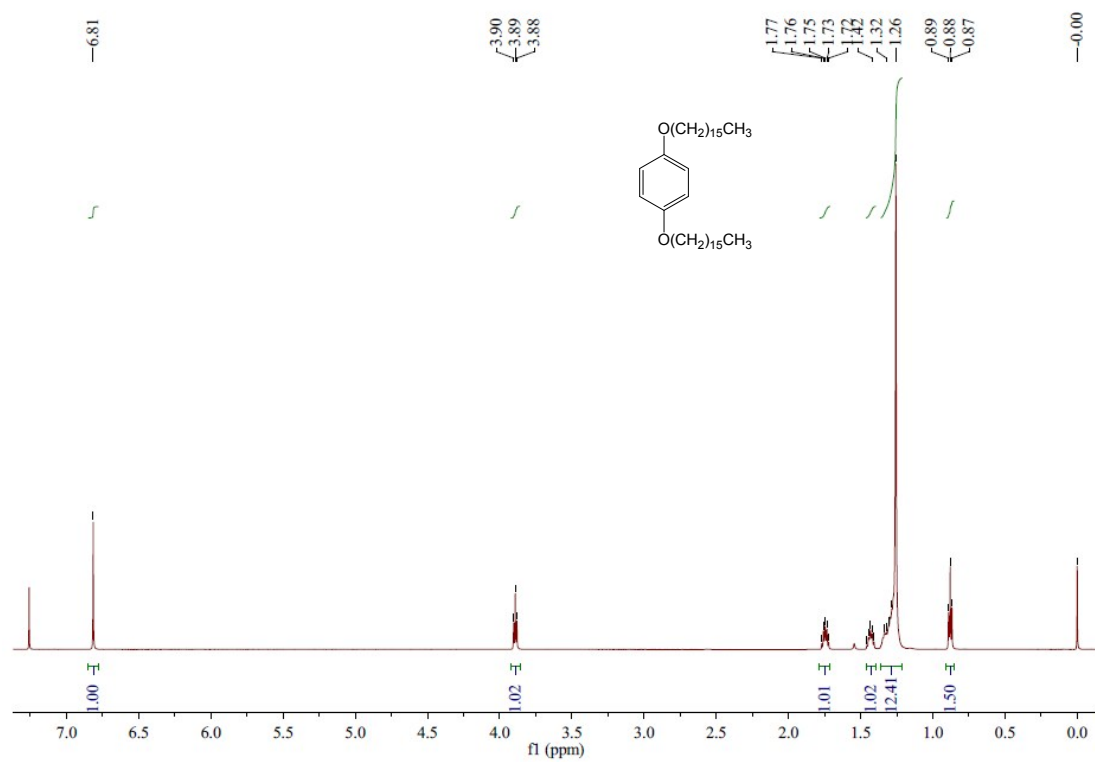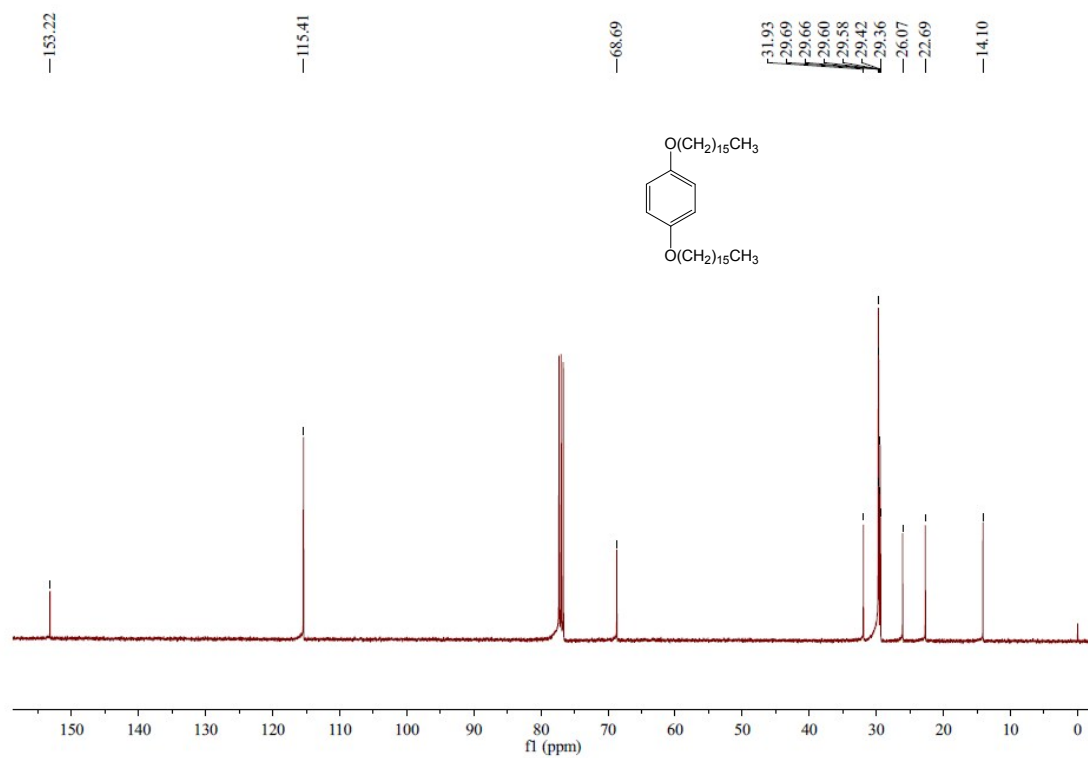

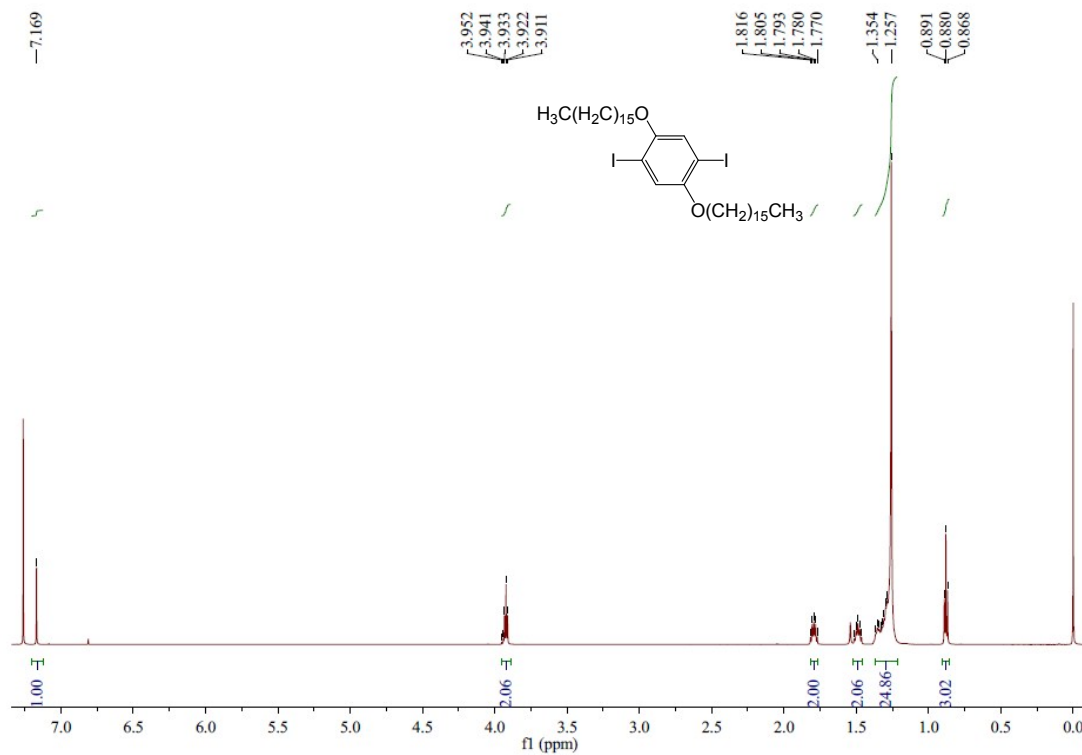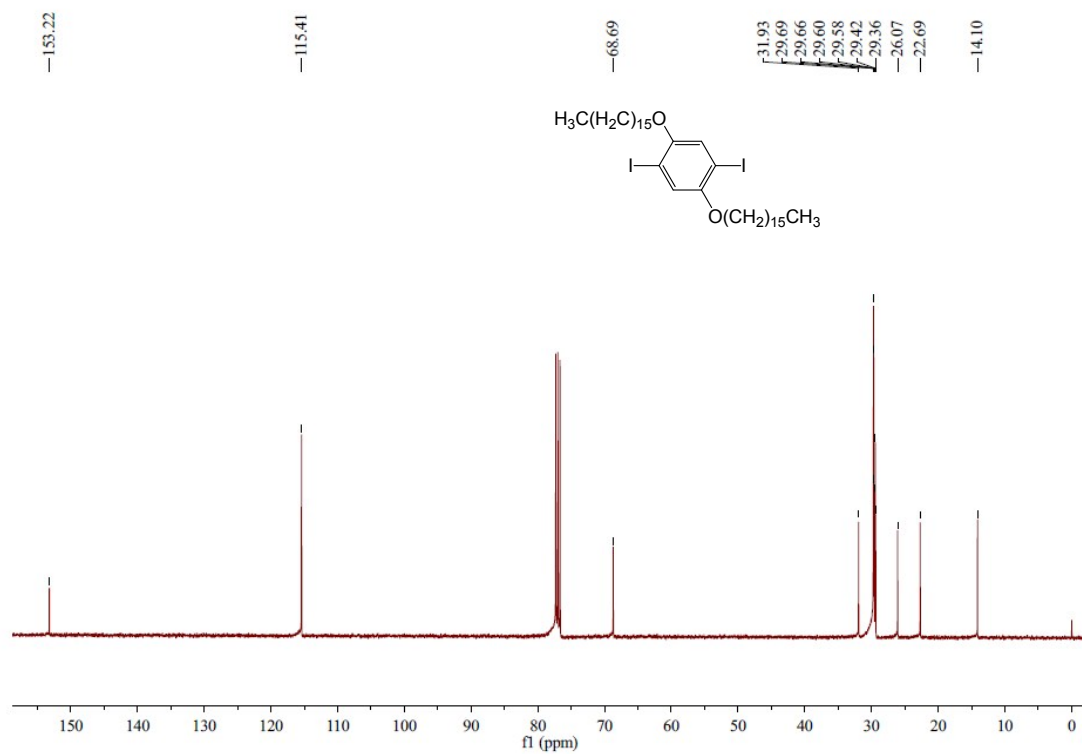

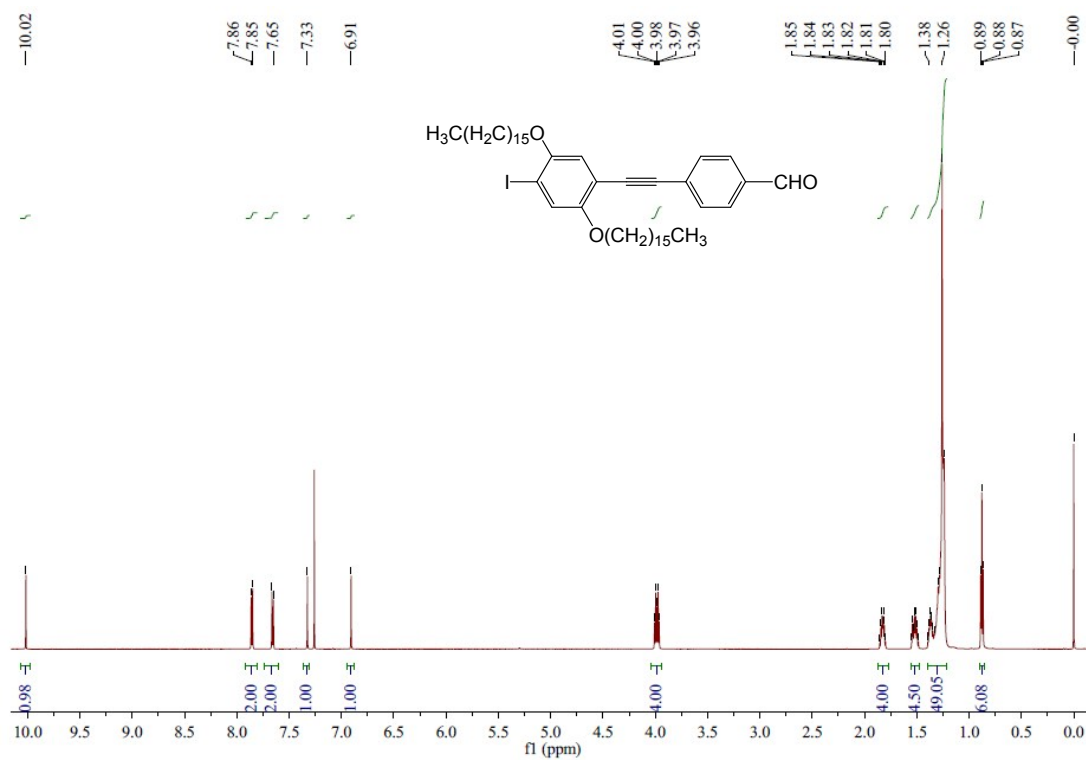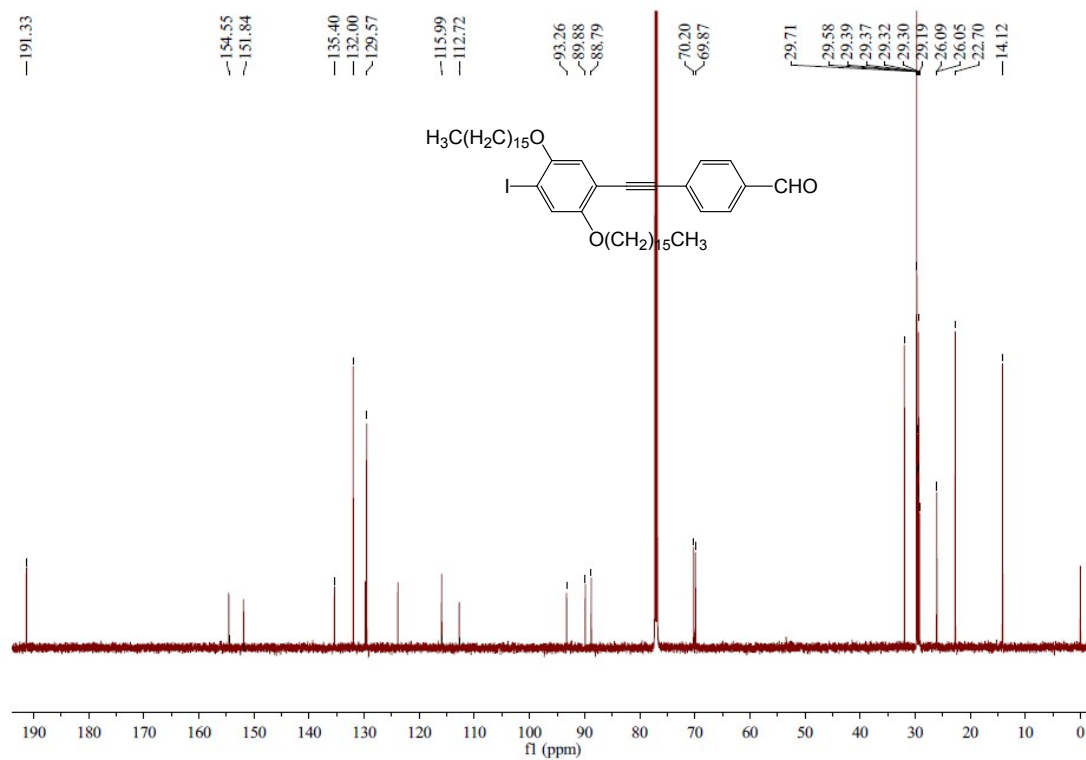

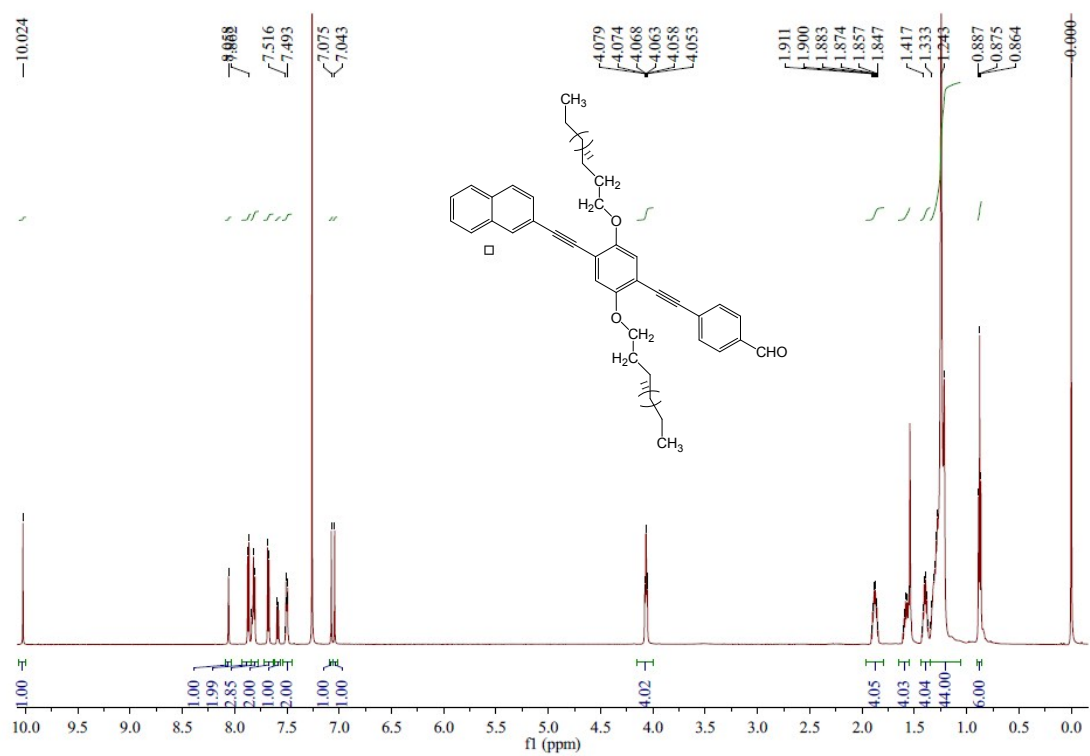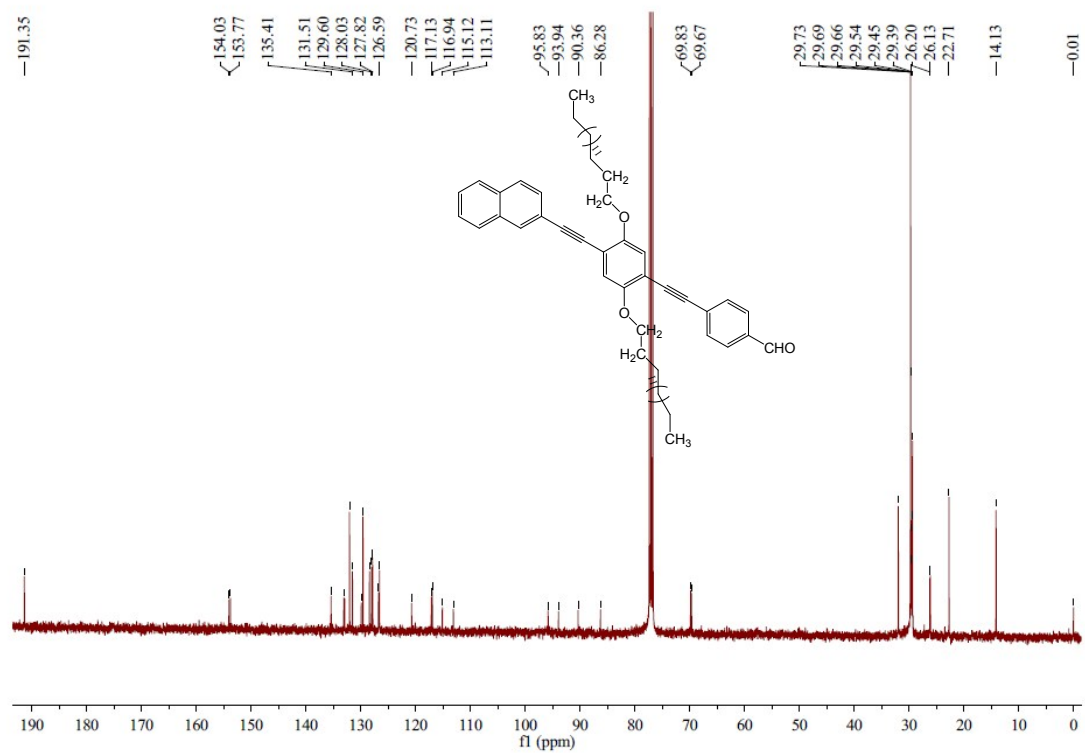

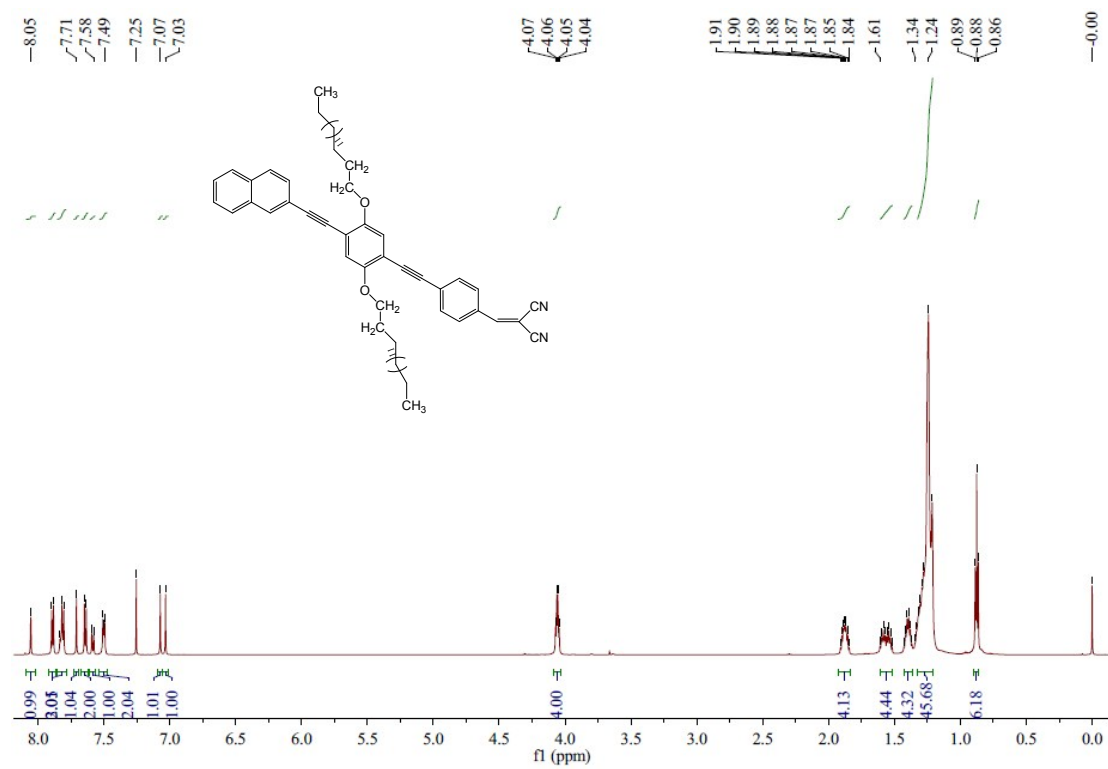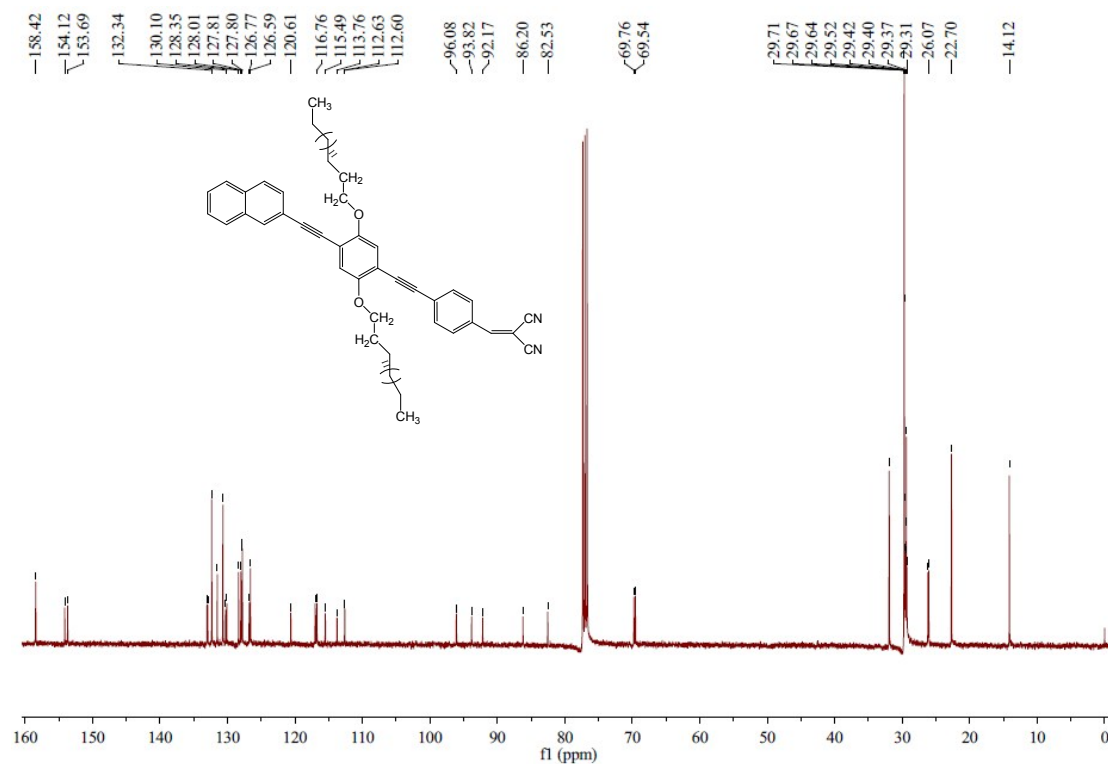

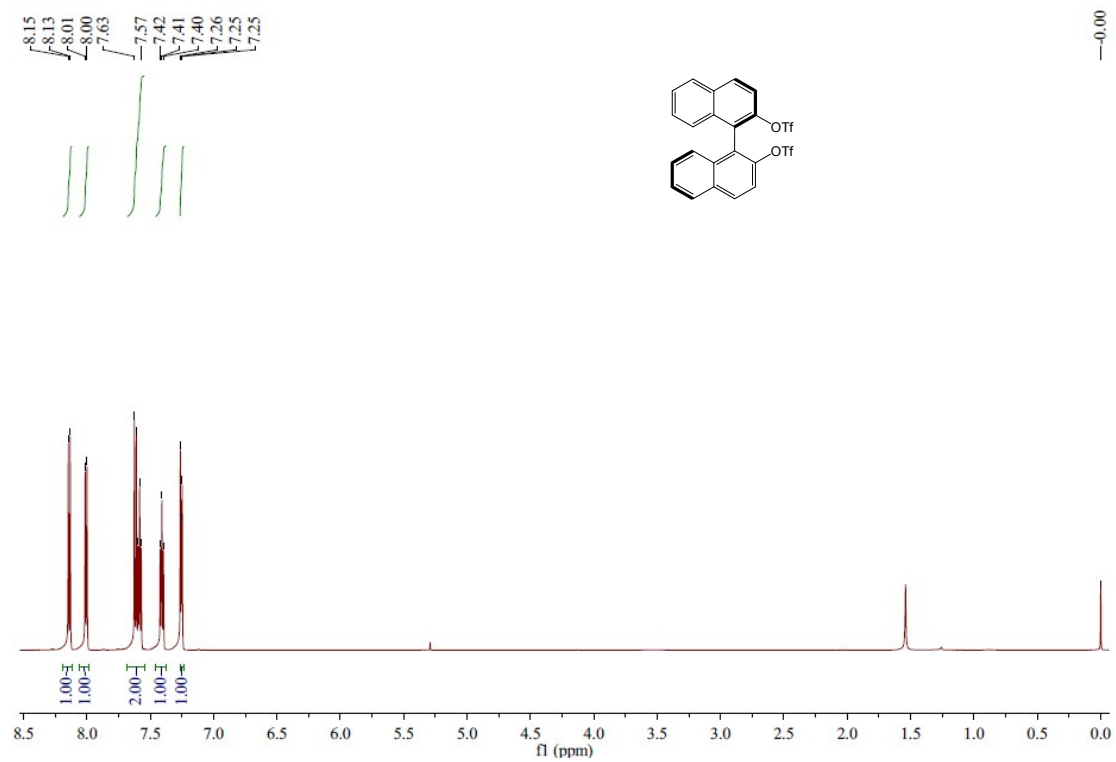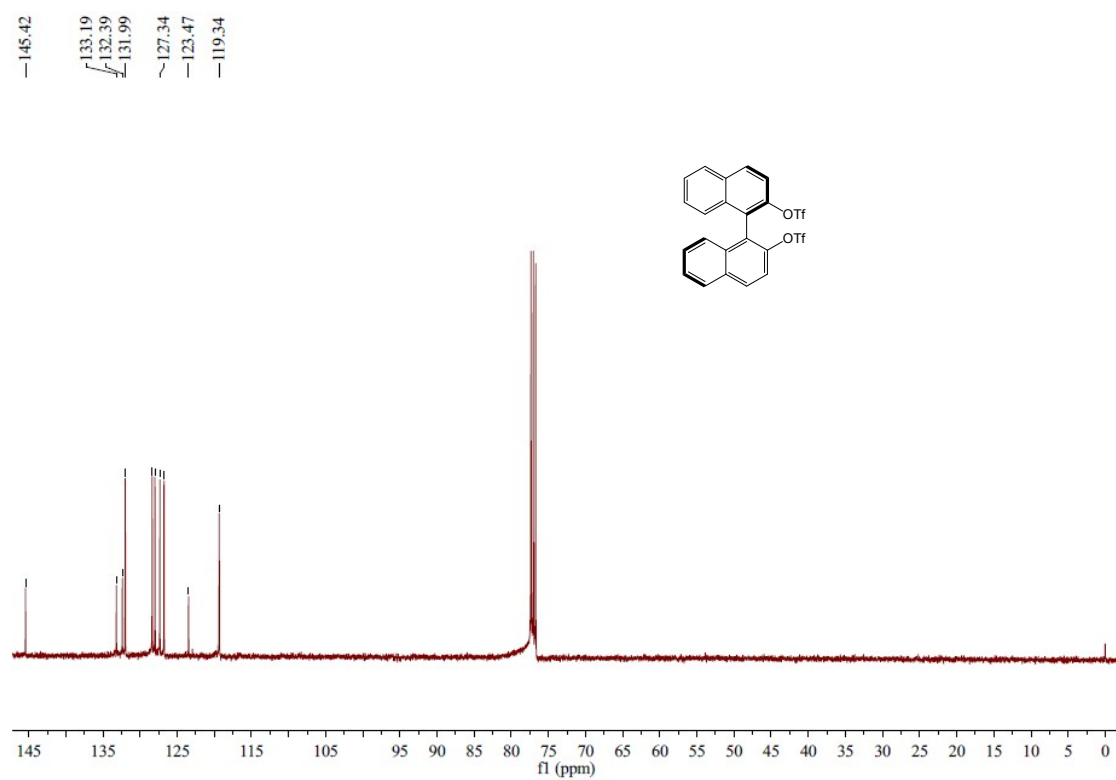



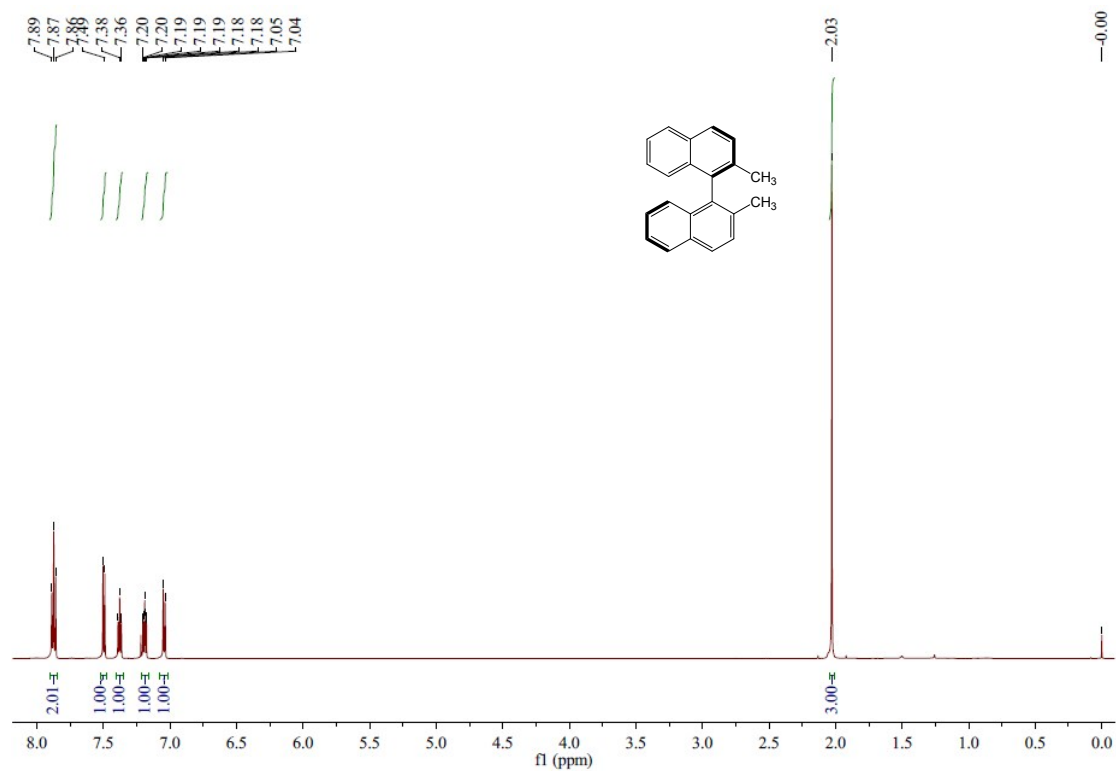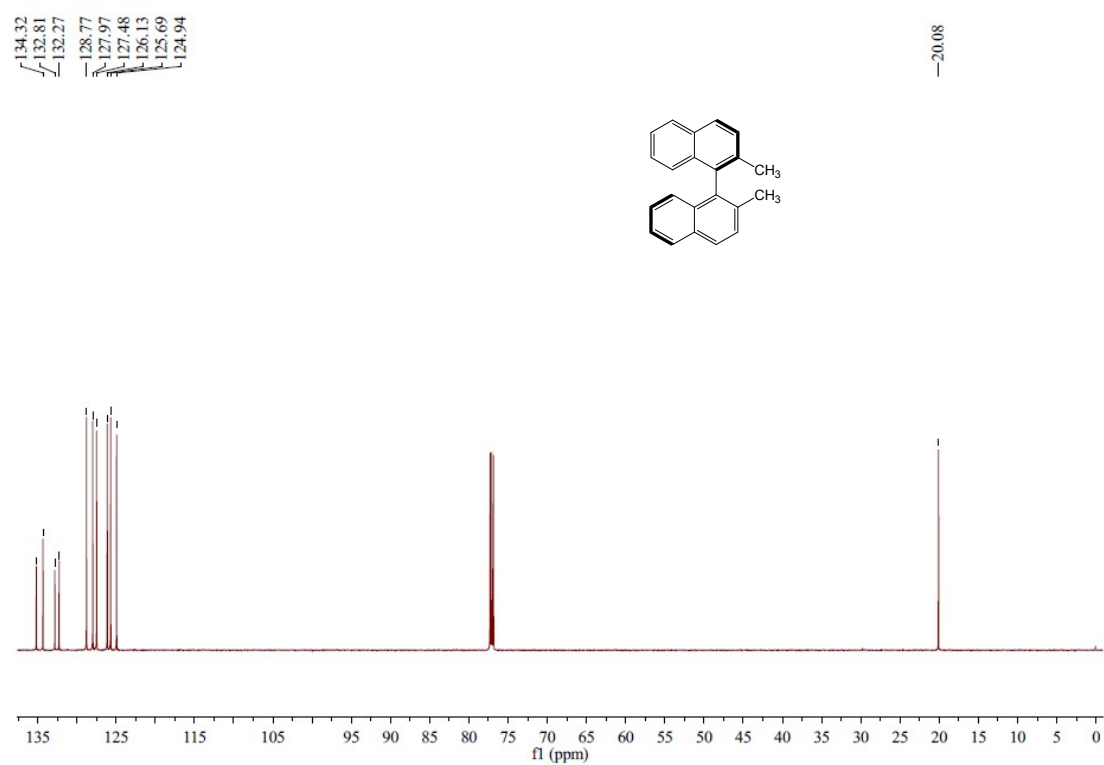

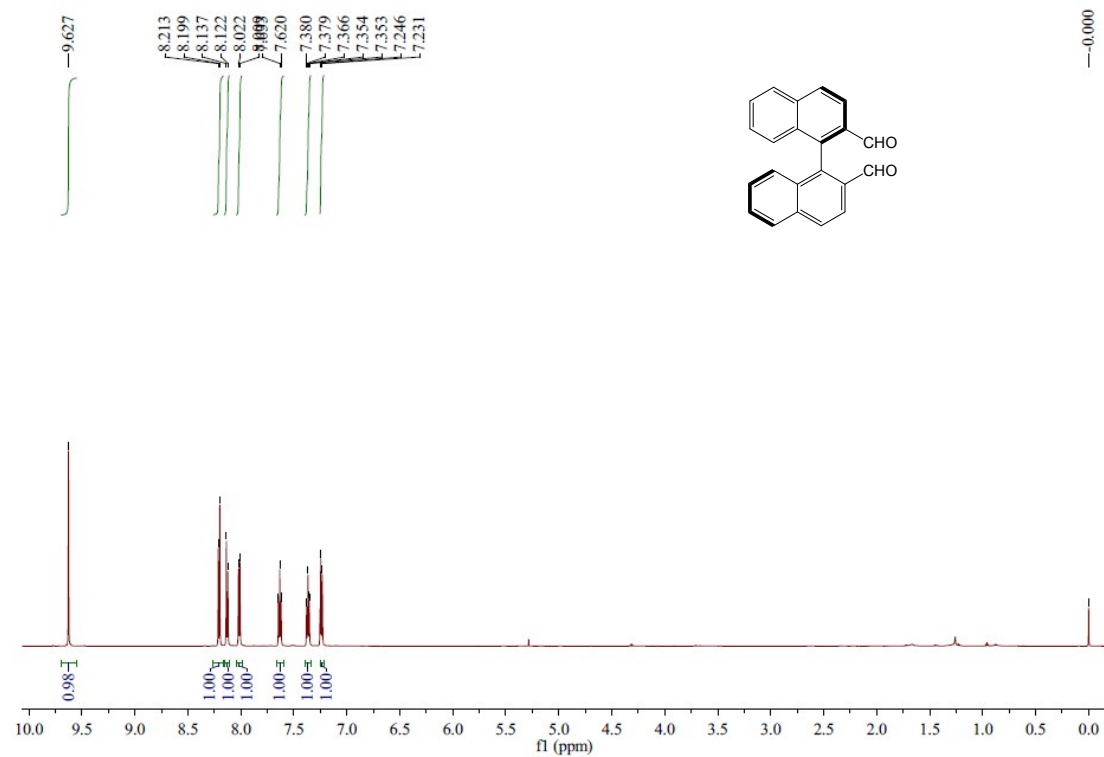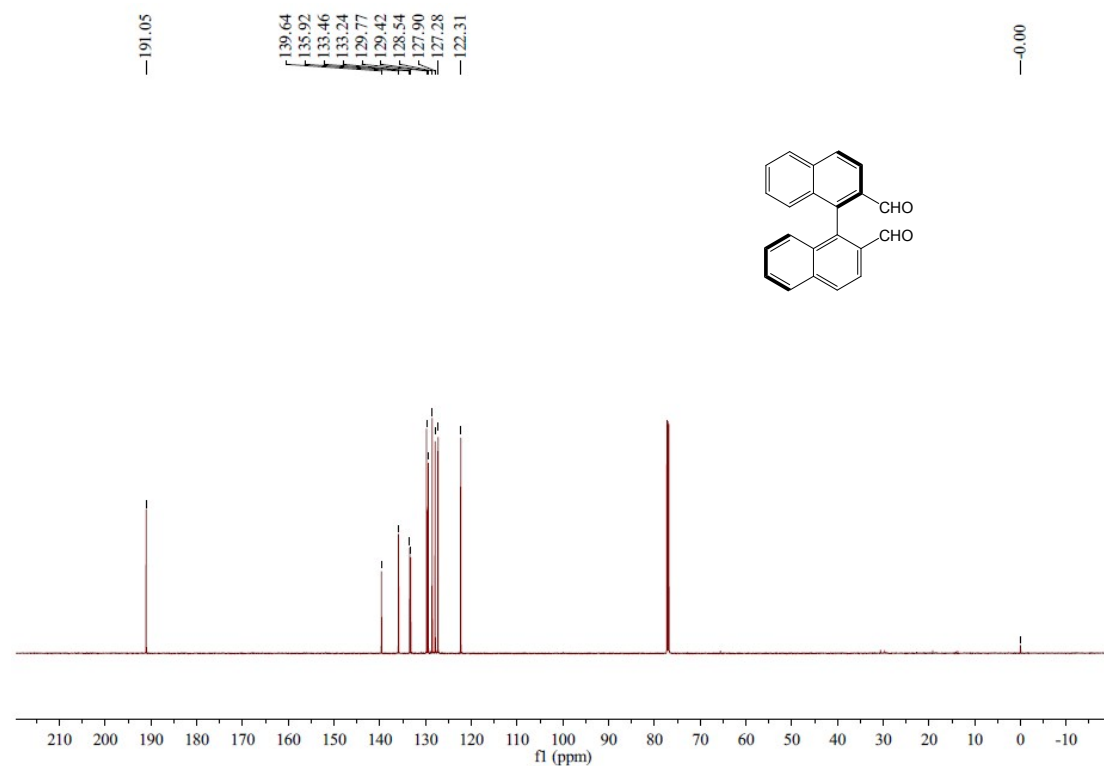



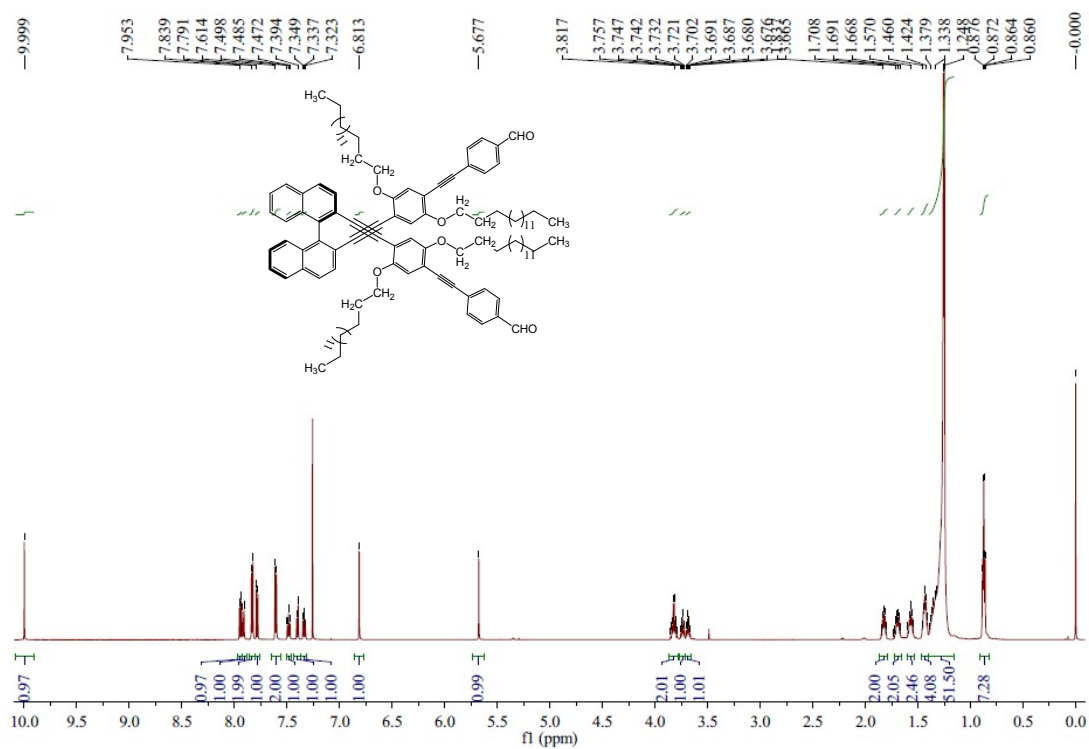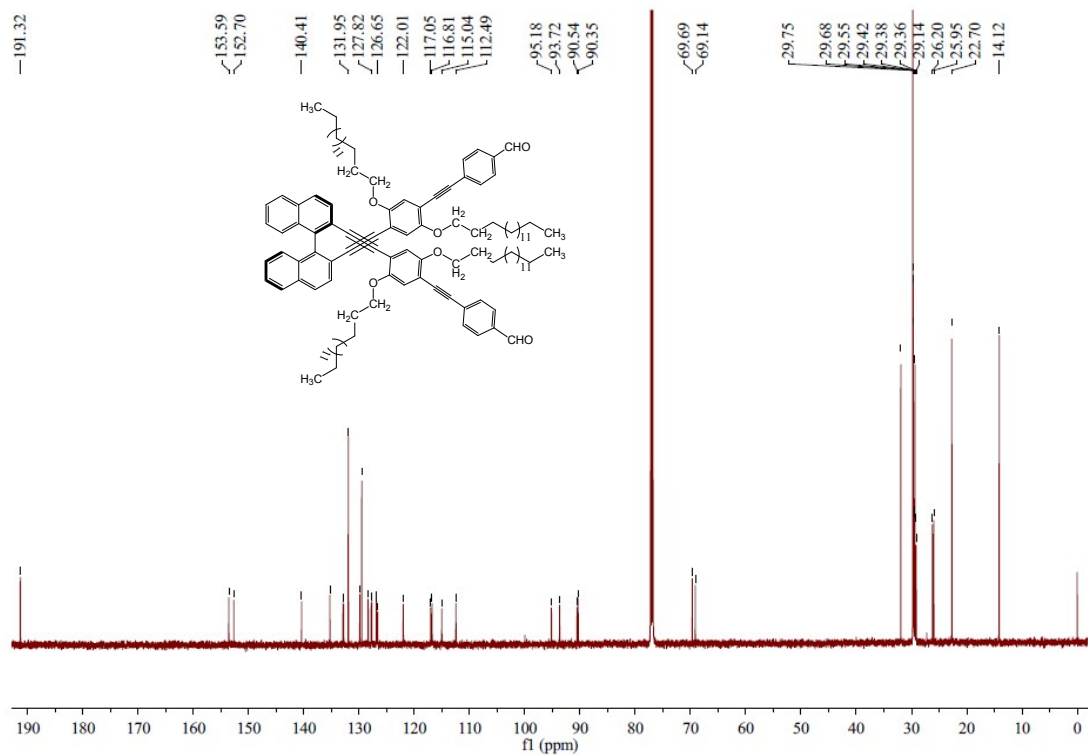

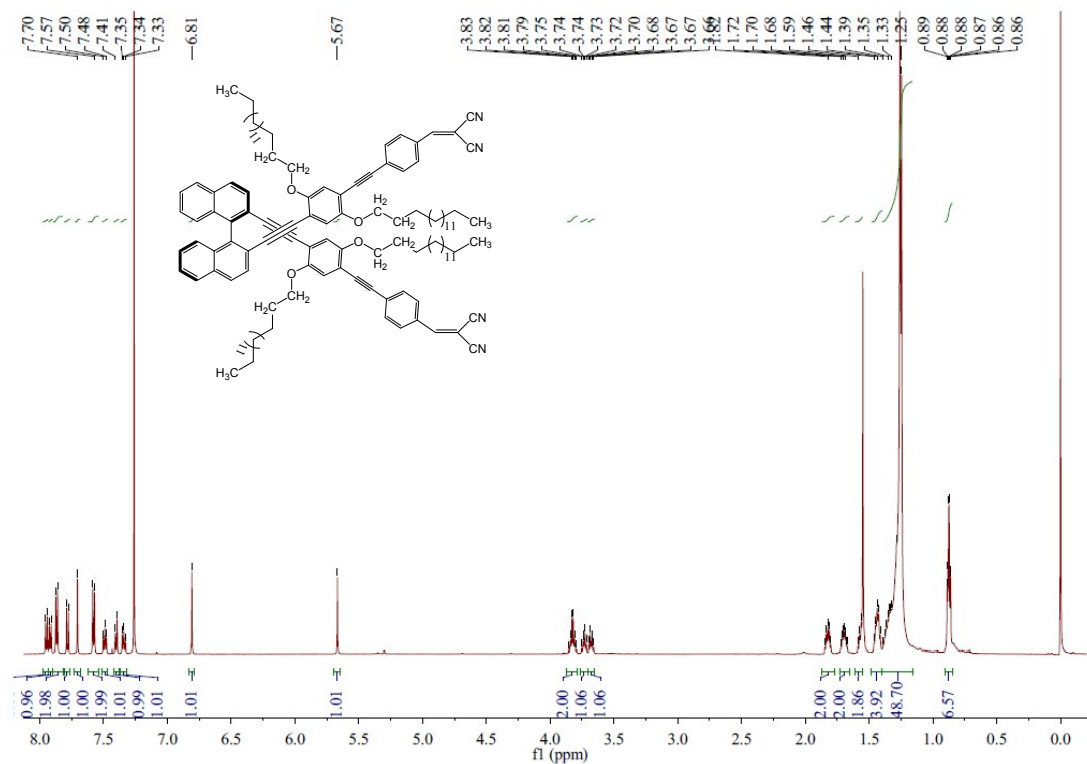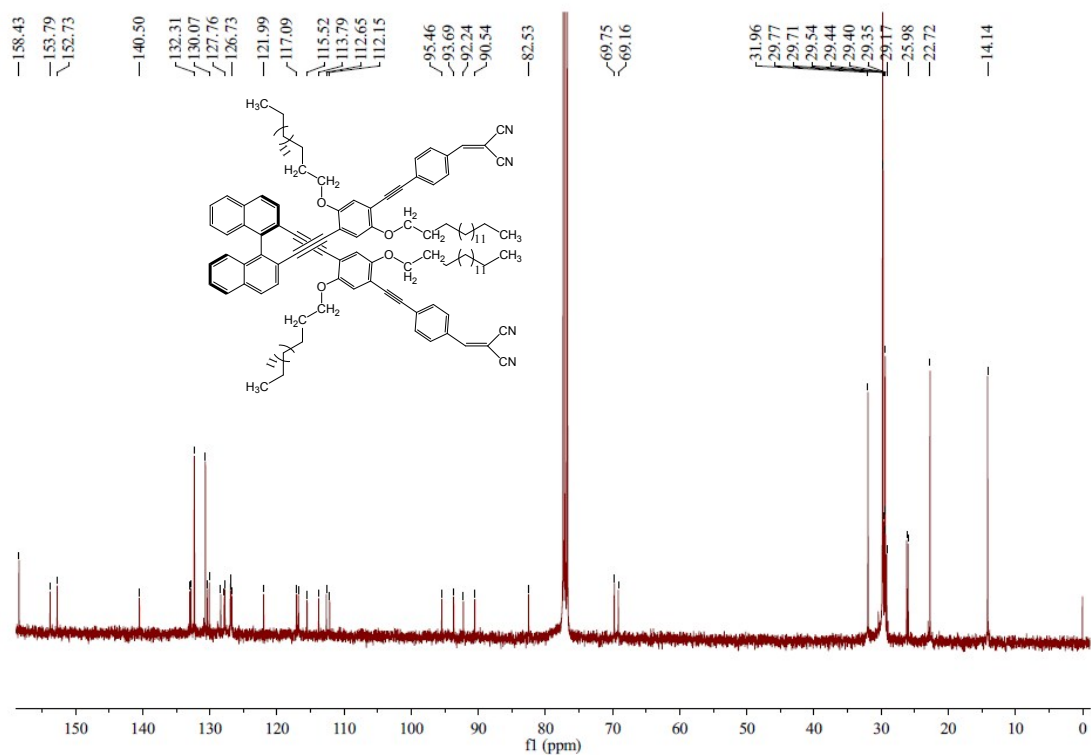

#### 4. MS spectra for PNBA, PNBD, BPNBA and BPNBD

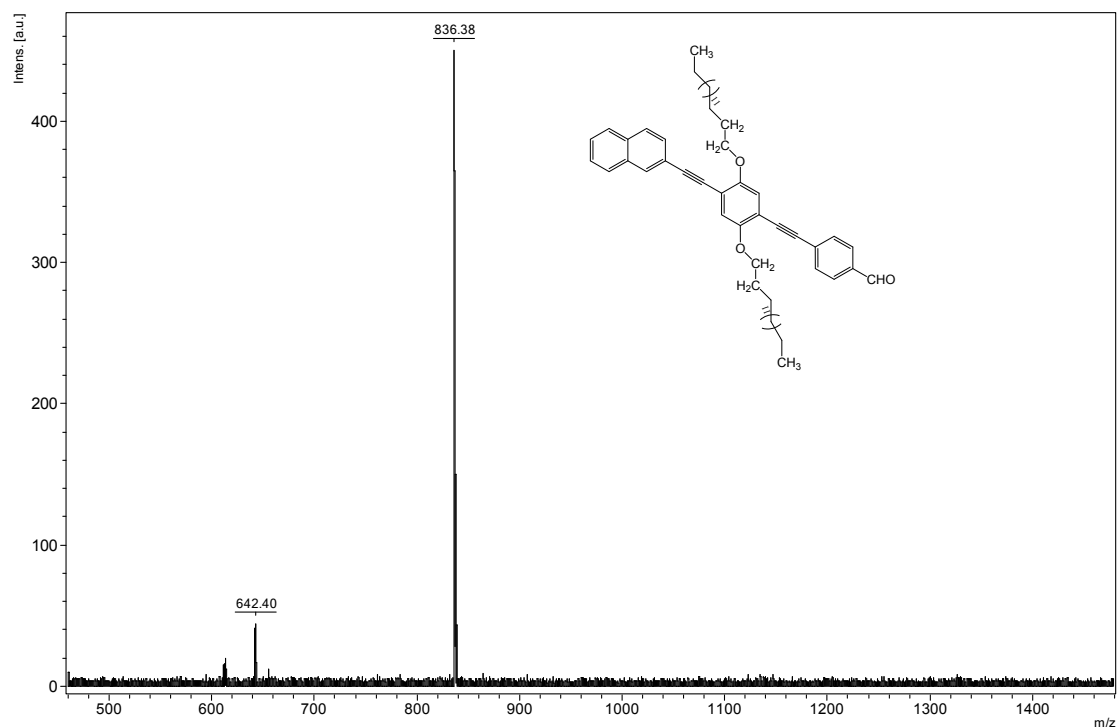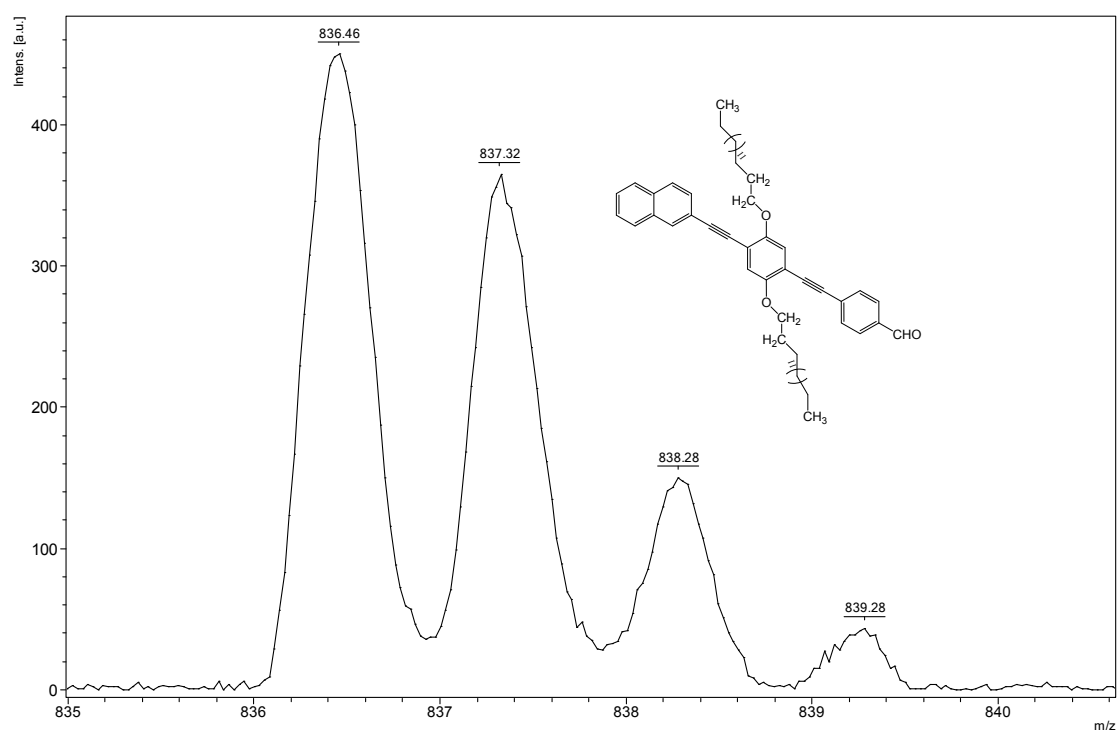

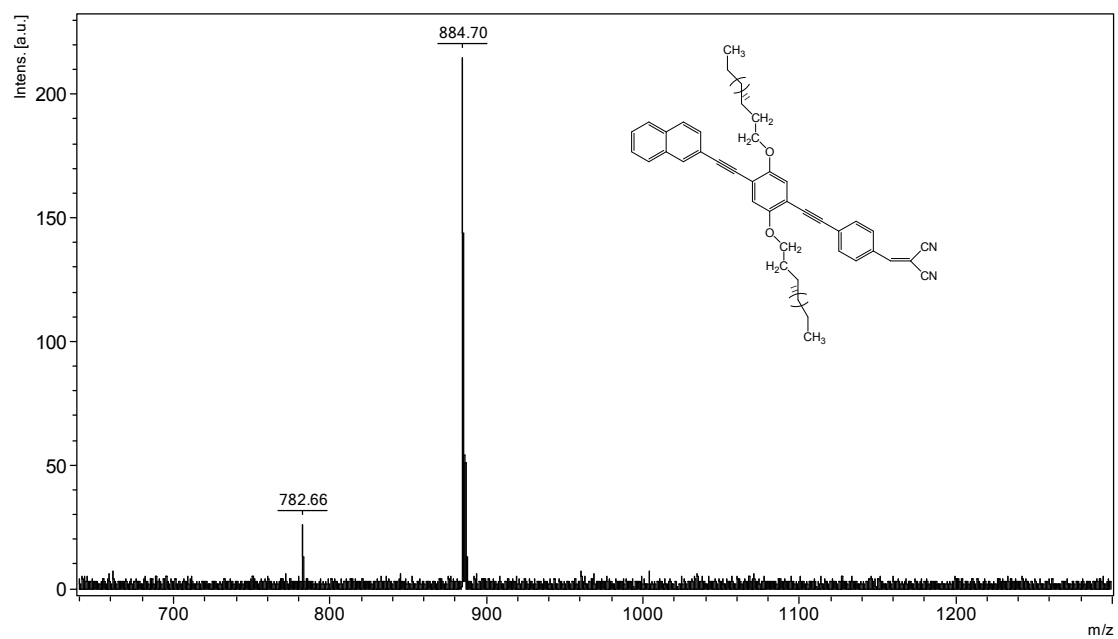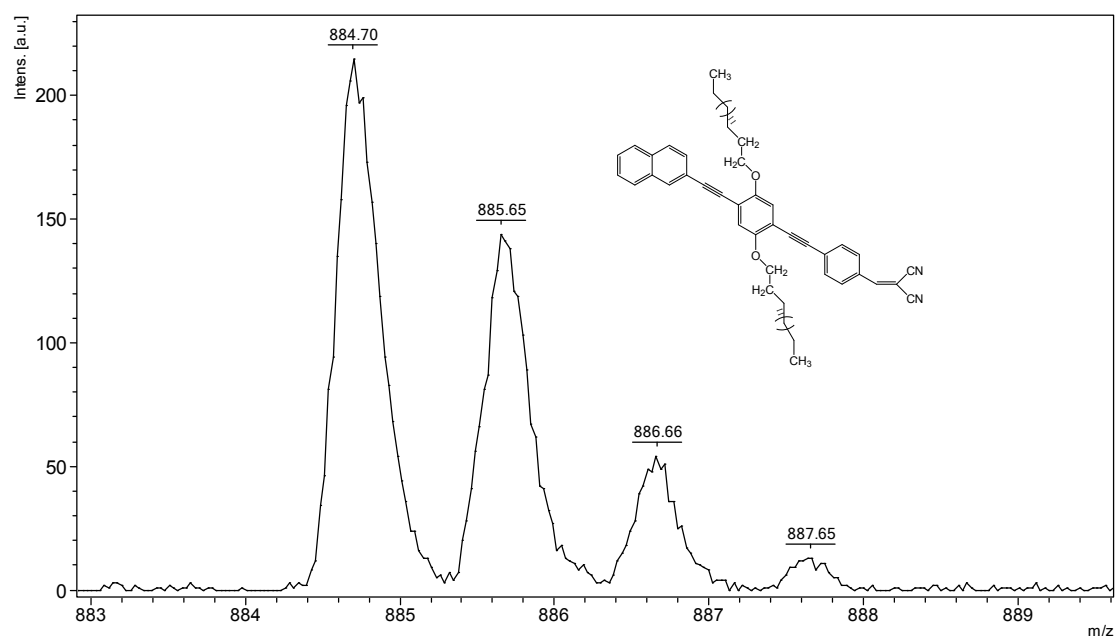

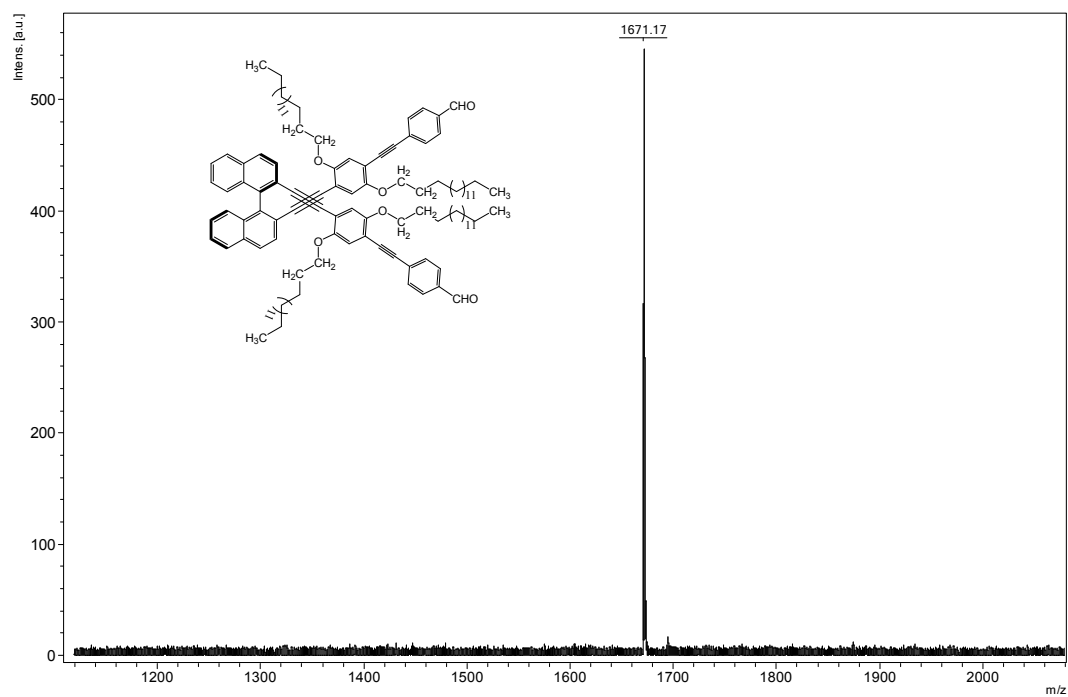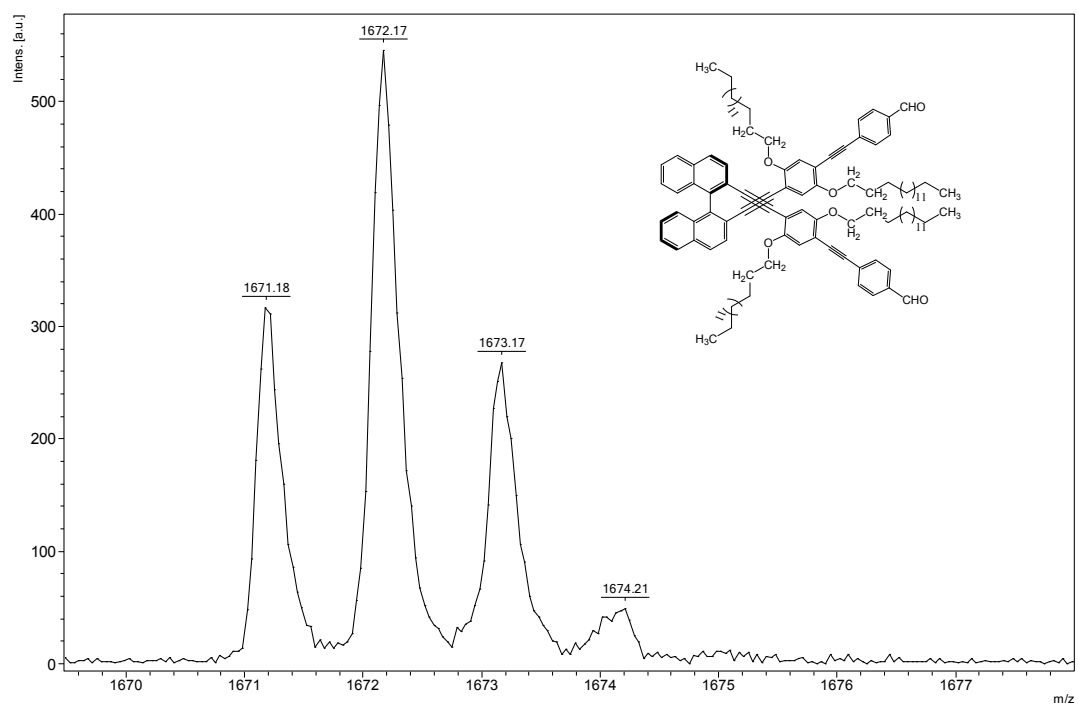



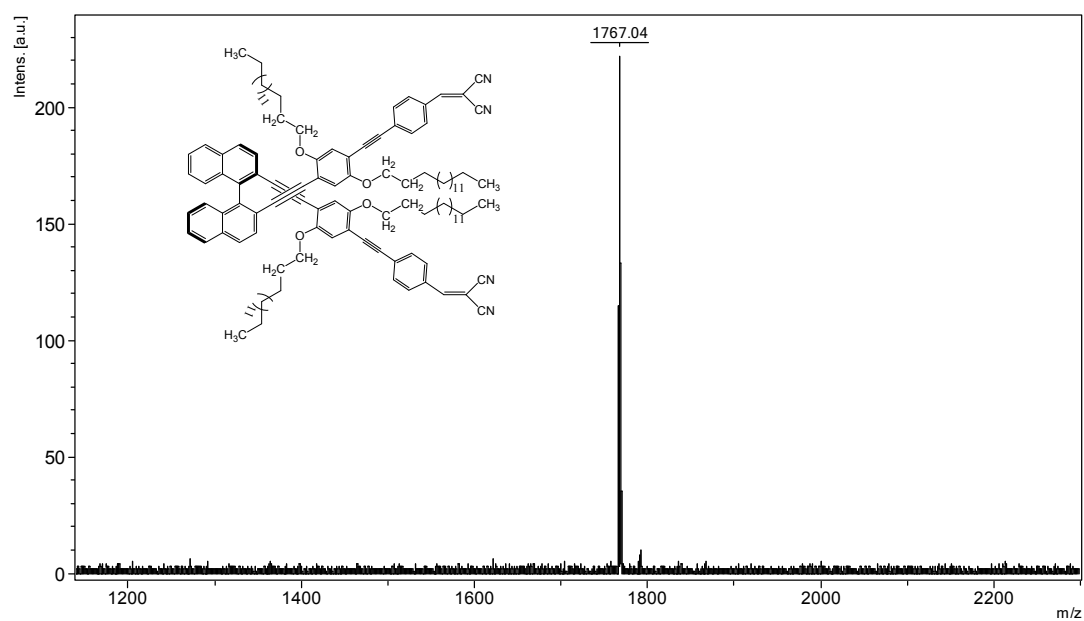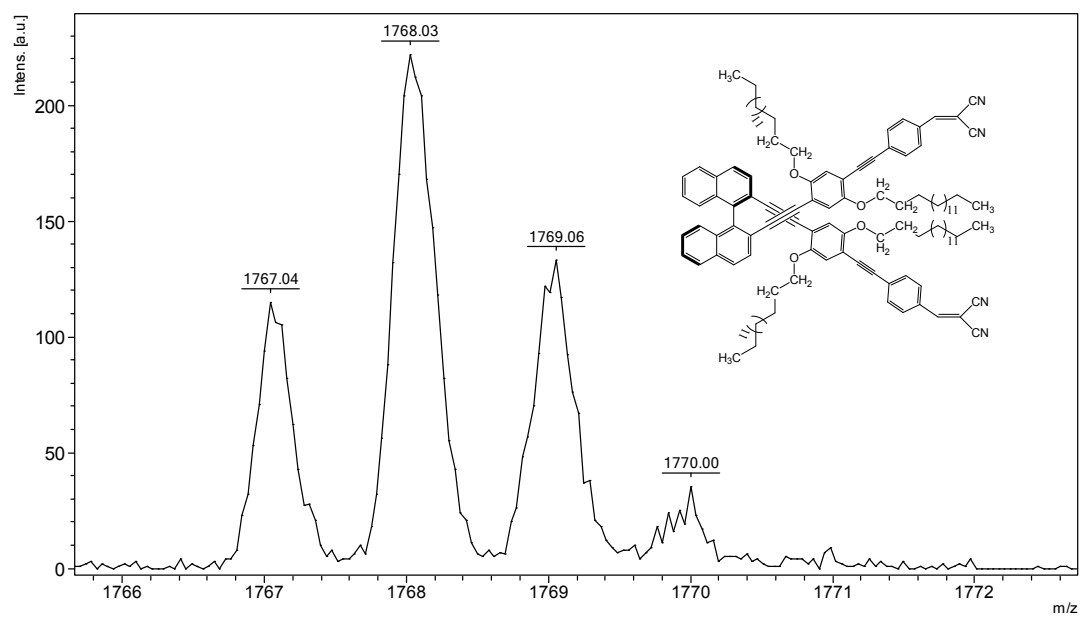

## 5. The optimized structures for PNBD and BPNBD

Ground state structure for **PNBD**:

|   | x        | y        | z        |
|---|----------|----------|----------|
| C | -8.97651 | 0.44863  | -0.06627 |
| C | -8.29197 | -0.80418 | -0.20103 |
| C | -6.87673 | -0.82308 | -0.17238 |
| C | -6.14223 | 0.34695  | -0.01663 |
| C | -6.83463 | 1.59159  | 0.1163   |
| C | -8.20547 | 1.6335   | 0.09144  |
| C | -10.395  | 0.46269  | -0.0953  |
| C | -11.1087 | -0.70532 | -0.2504  |
| C | -10.4337 | -1.94376 | -0.3842  |
| C | -9.05851 | -1.9916  | -0.36014 |
| H | -6.35618 | -1.77068 | -0.27834 |
| C | -4.72018 | 0.31654  | 0.01141  |
| H | -6.25486 | 2.50123  | 0.23728  |
| H | -8.72306 | 2.58433  | 0.19343  |
| H | -10.9114 | 1.41421  | 0.0072   |
| H | -12.1948 | -0.68095 | -0.2712  |
| H | -11.0081 | -2.85783 | -0.5066  |
| H | -8.53742 | -2.94031 | -0.4636  |
| C | -3.50304 | 0.2927   | 0.03105  |
| C | -2.08384 | 0.2856   | 0.05331  |
| C | -1.37274 | 1.50502  | 0.07481  |
| C | 0.01888  | 1.52774  | 0.0673   |
| C | 0.74547  | 0.30588  | 0.03319  |
| C | 0.02883  | -0.9046  | 0.02002  |
| C | -1.35936 | -0.92936 | 0.03057  |
| H | -1.94285 | 2.4253   | 0.08853  |
| O | 0.76894  | 2.66024  | 0.0846   |
| H | 0.56819  | -1.84508 | -0.01197 |
| O | -2.00715 | -2.13933 | -0.03695 |
| C | 2.16119  | 0.30652  | 0.01462  |
| C | 3.37909  | 0.28508  | -0.00162 |
| C | 4.79475  | 0.28136  | -0.0212  |
| C | 5.51798  | 1.49452  | -0.0062  |
| C | 6.9013   | 1.4818   | -0.02556 |
| C | 7.63146  | 0.27036  | -0.06017 |
| C | 6.90158  | -0.94168 | -0.07539 |
| C | 5.51785  | -0.93362 | -0.05637 |
| H | 4.97552  | 2.43372  | 0.02041  |

|   |          |          |          |
|---|----------|----------|----------|
| H | 7.44294  | 2.42438  | -0.01376 |
| C | 9.07407  | 0.37758  | -0.07727 |
| H | 7.41761  | -1.89326 | -0.10262 |
| H | 4.97157  | -1.87113 | -0.069   |
| C | 10.05858 | -0.57501 | -0.1072  |
| H | 9.44666  | 1.39952  | -0.06352 |
| C | 11.43075 | -0.15935 | -0.1176  |
| N | 12.54243 | 0.18518  | -0.1258  |
| C | 9.84328  | -1.98921 | -0.12922 |
| N | 9.68788  | -3.14288 | -0.14718 |
| C | 0.10162  | 3.91426  | 0.1097   |
| C | -2.50203 | -2.62976 | 1.21192  |
| H | -0.52338 | 4.0541   | -0.78146 |
| H | 0.88982  | 4.66865  | 0.12119  |
| H | -0.51792 | 4.02121  | 1.0093   |
| H | -2.97389 | -3.59074 | 0.99552  |
| H | -3.24399 | -1.94804 | 1.64371  |
| H | -1.68279 | -2.77864 | 1.92788  |

Ground state structure for **BPNBD**:

|   | x        | y        | z        |
|---|----------|----------|----------|
| C | -2.25516 | -5.88315 | 1.49765  |
| C | -2.00275 | -4.98031 | 2.56457  |
| C | -0.92981 | -4.06776 | 2.44541  |
| C | -0.13467 | -4.03425 | 1.31985  |
| C | -0.39485 | -4.93782 | 0.23684  |
| C | -1.42695 | -5.83087 | 0.34789  |
| C | -3.32673 | -6.80252 | 1.61423  |
| C | -4.10983 | -6.82366 | 2.7375   |
| C | -3.85903 | -5.92463 | 3.80004  |
| C | -2.83087 | -5.02514 | 3.71551  |
| H | -0.72732 | -3.37787 | 3.25869  |
| C | 0.94859  | -3.10945 | 1.23117  |
| H | -1.62782 | -6.51664 | -0.47052 |
| H | -3.51639 | -7.49095 | 0.79557  |
| H | -4.928   | -7.53251 | 2.8173   |
| H | -4.48696 | -5.95238 | 4.685    |
| H | -2.63349 | -4.33235 | 4.52857  |
| C | 1.86745  | -2.32969 | 1.14273  |
| C | 2.958    | -1.42847 | 0.97957  |
| C | 3.57937  | -1.29908 | -0.26865 |
| C | 4.62044  | -0.40692 | -0.45845 |
| C | 5.07134  | 0.39137  | 0.60773  |

|   |          |          |          |
|---|----------|----------|----------|
| C | 4.45761  | 0.25381  | 1.85867  |
| C | 3.41905  | -0.6409  | 2.05018  |
| H | 3.23226  | -1.88967 | -1.10903 |
| O | 5.17486  | -0.27927 | -1.70327 |
| H | 4.78066  | 0.86427  | 2.69391  |
| O | 2.82191  | -0.70624 | 3.27907  |
| C | 6.12022  | 1.33532  | 0.41538  |
| C | 7.01143  | 2.13959  | 0.27065  |
| C | 8.05453  | 3.09006  | 0.08384  |
| C | 8.5181   | 3.39358  | -1.20402 |
| C | 9.53145  | 4.31598  | -1.37528 |
| C | 10.12197 | 4.96704  | -0.2793  |
| C | 9.65137  | 4.66025  | 1.00878  |
| C | 8.63666  | 3.73946  | 1.18362  |
| H | 8.07066  | 2.90134  | -2.06    |
| H | 9.88032  | 4.54389  | -2.3783  |
| C | 11.18145 | 5.91446  | -0.57725 |
| H | 10.07521 | 5.14066  | 1.88059  |
| H | 8.28037  | 3.5106   | 2.18164  |
| C | 11.95954 | 6.67517  | 0.23224  |
| H | 11.38875 | 6.03223  | -1.63766 |
| C | 12.9466  | 7.53554  | -0.35502 |
| N | 13.73943 | 8.22468  | -0.83919 |
| C | 11.8901  | 6.69924  | 1.66259  |
| N | 11.84514 | 6.72749  | 2.81834  |
| C | 6.37129  | -1.02115 | -1.8942  |
| C | 3.20113  | -1.82552 | 4.06877  |
| H | 7.15733  | -0.69336 | -1.20497 |
| H | 6.68966  | -0.83495 | -2.92094 |
| H | 6.19347  | -2.09462 | -1.75722 |
| H | 2.65497  | -1.73705 | 5.00891  |
| H | 4.27889  | -1.81327 | 4.2719   |
| H | 2.93318  | -2.7679  | 3.58017  |
| C | 2.29771  | -5.7226  | -2.37572 |
| C | 1.51794  | -5.79851 | -1.1877  |
| C | 0.4381   | -4.88577 | -0.99973 |
| C | 0.16325  | -3.93623 | -1.97207 |
| C | 0.95398  | -3.86794 | -3.15314 |
| C | 1.98795  | -4.73538 | -3.34541 |
| C | 3.36771  | -6.63181 | -2.56221 |
| C | 3.66224  | -7.57479 | -1.6149  |
| C | 2.89554  | -7.64849 | -0.43112 |
| C | 1.85329  | -6.7855  | -0.22285 |

|   |          |          |          |
|---|----------|----------|----------|
| C | -0.9145  | -3.01539 | -1.80477 |
| H | 0.7145   | -3.11196 | -3.89286 |
| H | 2.58864  | -4.68158 | -4.2488  |
| H | 3.95211  | -6.56478 | -3.47566 |
| H | 4.48455  | -8.26639 | -1.7689  |
| H | 3.1364   | -8.39557 | 0.31865  |
| H | 1.26905  | -6.84812 | 0.68791  |
| C | -1.82245 | -2.23022 | -1.66394 |
| C | -2.90306 | -1.33424 | -1.42333 |
| C | -3.50153 | -1.28642 | -0.15819 |
| C | -4.53238 | -0.40311 | 0.11097  |
| C | -4.99705 | 0.46808  | -0.89013 |
| C | -4.40559 | 0.4136   | -2.15812 |
| C | -3.37649 | -0.47169 | -2.42886 |
| H | -3.14331 | -1.9347  | 0.63354  |
| O | -5.06439 | -0.35542 | 1.37108  |
| H | -4.73874 | 1.08161  | -2.94389 |
| O | -2.80039 | -0.4543  | -3.66936 |
| C | -6.03814 | 1.3994   | -0.61301 |
| C | -6.9236  | 2.19236  | -0.39123 |
| C | -7.95947 | 3.12676  | -0.10833 |
| C | -8.40004 | 3.32098  | 1.20847  |
| C | -9.40639 | 4.2282   | 1.47491  |
| C | -10.0124 | 4.97197  | 0.44854  |
| C | -9.56499 | 4.77438  | -0.86886 |
| C | -8.55739 | 3.86884  | -1.13882 |
| H | -7.94023 | 2.75636  | 2.01157  |
| H | -9.73739 | 4.37087  | 2.49951  |
| C | -11.0623 | 5.89378  | 0.84429  |
| H | -10.0016 | 5.32831  | -1.68925 |
| H | -8.21911 | 3.7246   | -2.15869 |
| C | -11.8486 | 6.72544  | 0.1166   |
| H | -11.2528 | 5.91945  | 1.91405  |
| C | -12.8221 | 7.53496  | 0.79216  |
| N | -13.6038 | 8.18222  | 1.34705  |
| C | -11.8005 | 6.87461  | -1.30702 |
| N | -11.7726 | 7.00401  | -2.4564  |
| C | -6.24599 | -1.12584 | 1.54038  |
| C | -3.19259 | -1.51794 | -4.52666 |
| H | -7.04849 | -0.77224 | 0.88343  |
| H | -6.54916 | -1.00202 | 2.58103  |
| H | -6.05483 | -2.18716 | 1.34134  |
| H | -2.6623  | -1.36516 | -5.4676  |

|   |          |          |          |
|---|----------|----------|----------|
| H | -4.27363 | -1.49334 | -4.71036 |
| H | -2.91609 | -2.49095 | -4.10786 |

## 6. References

1. An, D. L.; Nakano, T.; Orita, A.; Otera, J. *Angew. Chem. Int. Ed.* 2002, 41, 171-173.
2. Ooi, T.; Kameda, M.; Maruoka, K. *J. Am. Chem. Soc.* 2003, 125, 5139-5151.
3. Cui, H.; He, G.; Wang, H. Y.; Sun, X. H. Ding, L. P.; Fang Y. *ACS Appl. Mater. Interfaces*, 2012, 4, 6935-6941.
